# Supplementary material for: Design and evaluation of mobile monitoring campaigns for air pollution exposure assessment in epidemiologic cohorts
Source: bioRxiv or medRxiv preprint supplement (doi:10.1101/2021.04.21.21255641), 2021-08-29
Supplement: Supplementary file [file media-1.pdf]

## Supplementary Information

### **Design and evaluation of mobile monitoring campaigns for air pollution exposure assessment in epidemiologic cohorts**

Magali N. Blanco,<sup>a</sup> Annie Doubleday,<sup>a</sup> Elena Austin,<sup>a</sup> Julian D. Marshall,<sup>b</sup> Edmund Seto,<sup>a</sup> Tim Larson,<sup>a,b</sup> Lianne Sheppard<sup>a,c</sup>

<sup>a</sup>Department of Environmental and Occupational Health Sciences, School of Public Health, University of Washington, Hans Rosling Center for Population Health, 3980 15th Ave NE, Seattle, WA 98195

<sup>b</sup>Department of Civil & Environmental Engineering, College of Engineering, University of Washington, 201 More Hall, Box 352700, Seattle, WA 98195

<sup>c</sup>Department of Biostatistics, School of Public Health, University of Washington, Hans Rosling Center for Population Health, 3980 15th Ave NE, Seattle, WA 98195

## Table of Contents

|          |                                       |           |
|----------|---------------------------------------|-----------|
| <b>1</b> | <b>METHODS</b> .....                  | <b>1</b>  |
| <b>2</b> | <b>HOURLY READINGS</b> .....          | <b>11</b> |
| <b>3</b> | <b>ANNUAL AVERAGE ESTIMATES</b> ..... | <b>15</b> |
| <b>4</b> | <b>MODEL PREDICTIONS</b> .....        | <b>19</b> |
| <b>5</b> | <b>MODEL ASSESSMENT</b> .....         | <b>27</b> |

## List of Tables

|                                                                                                                                  |    |
|----------------------------------------------------------------------------------------------------------------------------------|----|
| TABLE S1. TWO-WEEK SAMPLING WINDOWS FOR THE RUSH HOURS AND BUSINESS HOURS DESIGNS .....                                          | 3  |
| TABLE S2. GEOCOVARIATES AND BUFFERS INCLUDED IN PLS REGRESSION (N = 321) .....                                                   | 3  |
| TABLE S3. DISTRIBUTION OF THE NUMBER OF HOURLY AND DAY EQUIVALENT (24 SAMPLES/DAY) OBSERVATIONS PER SITE <sup>1</sup> .....      | 11 |
| TABLE S4. DISTRIBUTION OF HOURLY CONCENTRATIONS (PPB) <sup>1</sup> .....                                                         | 11 |
| TABLE S5. DISTRIBUTION OF ANNUAL AVERAGE NO <sub>x</sub> ESTIMATES FROM VARIOUS SAMPLING APPROACHES. <sup>1</sup> .....          | 15 |
| TABLE S6. PREDICTIONS ABOVE 80 PPB EXCLUDED FROM PREDICTION PLOTS, IF NOTED <sup>1</sup> .....                                   | 23 |
| TABLE S7. DISTRIBUTION OF PREDICTION BIAS FOR SHORT-TERM APPROACHES RELATIVE TO THE GOLD STANDARD PREDICTIONS <sup>1</sup> ..... | 26 |

## List of Figures

|                                                                                                                                                                                                                                                                                                                                                                                                   |    |
|---------------------------------------------------------------------------------------------------------------------------------------------------------------------------------------------------------------------------------------------------------------------------------------------------------------------------------------------------------------------------------------------------|----|
| FIGURE S1. HIERARCHICAL STRUCTURE OF SIMULATIONS. ....                                                                                                                                                                                                                                                                                                                                            | 1  |
| FIGURE S2. LOESS LINES FOR ABSOLUTE AND PERCENT ERROR OF THE NO <sub>x</sub> ANNUAL AVERAGE (PPB), AVERAGED ACROSS 10,000 RANDOM SAMPLES AND 69 SITES, BY NUMBER OF REPEAT VISITS. THE COLORED CURVES ARE FOR INDIVIDUAL SITES, THE BLACK CURVE IS THE OVERALL TREND, AND THE DASHED VERTICAL LINE IS FOR 28 REPEAT VISITS. ....                                                                  | 2  |
| FIGURE S3. AQS SITES INCLUDED IN THE ANALYSIS OF EACH POLLUTANT (N=69 NO <sub>x</sub> , 51 NO, 73 NO <sub>2</sub> ). SITE ID IS A COMPILATION OF THE CA STATE ID (6, THE FIRST DIGIT), COUNTY ID (NEXT 3 DIGITS), AND AQS SITE ID (LAST 4 DIGITS). ....                                                                                                                                           | 10 |
| FIGURE S4. CONCENTRATION TRENDS FOR NO <sub>x</sub> , NO, AND NO <sub>2</sub> OVER THE COURSE OF 2016 AT AQS SITES INCLUDED IN THIS STUDY (N=69 NO <sub>x</sub> , 51 NO, 73 NO <sub>2</sub> ). COLORED LINES ARE INDIVIDUAL SITES. ....                                                                                                                                                           | 12 |
| FIGURE S5. CONCENTRATION TRENDS FOR NO <sub>x</sub> , NO, AND NO <sub>2</sub> BY DAY AND SEASON AT AQS SITES INCLUDED IN THIS STUDY (N=69 NO <sub>x</sub> , 51 NO, 73 NO <sub>2</sub> ). COLORED LINES ARE INDIVIDUAL SITES. ....                                                                                                                                                                 | 13 |
| FIGURE S6. CONCENTRATION TRENDS FOR NO <sub>x</sub> , NO, AND NO <sub>2</sub> BY HOUR AND SEASON AT AQS SITES INCLUDED IN THIS STUDY (N=69 NO <sub>x</sub> , 51 NO, 73 NO <sub>2</sub> ). COLORED LINES ARE INDIVIDUAL SITES. ....                                                                                                                                                                | 14 |
| FIGURE S7. ANNUAL AVERAGE SITE CONCENTRATION ESTIMATES FOR DIFFERENT POLLUTANTS AND DESIGN VERSIONS. N=30 CAMPAIGNS PER DESIGN VERSION X 69 SITES FOR SHORT-TERM APPROACHES; N = 1 CAMPAIGN PER DESIGN VERSION X 69 SITES FOR LONG-TERM APPROACHES. SHORT-TERM APPROACHES APPEAR TO BE MORE VARIABLE (LESS PRECISE), IN LARGE PART BECAUSE ALL 30 CAMPAIGNS ARE REPRESENTED IN THE BOXPLOTS. .... | 17 |
| FIGURE S8. SITE-SPECIFIC NO <sub>x</sub> ESTIMATE BIASES FOR SHORT-TERM DESIGNS (N = 30 CAMPAIGNS) AS COMPARED TO THE TRUE ESTIMATES (LONG-TERM BALANCED DESIGN VERSION 1). ALL SITES ARE INCLUDED. SITES ARE ARRANGED BY THE TRUE NO <sub>x</sub> AVERAGE, WITH HIGHER CONCENTRATIONS HIGHER UP. ....                                                                                            | 18 |
| FIGURE S9. VARIATION OF PREDICTIONS ACROSS 69 SITES BY DESIGN RELATIVE TO THE GOLD STANDARD PREDICTIONS (RELATIVE STANDARD DEVIATION [RSD]). BOXPLOTS ARE FOR SHORT-TERM APPROACHES (30 CAMPAIGNS), SQUARES ARE FOR LONG-TERM APPROACHES (1 CAMPAIGN). VALUES OF 1 INDICATE THAT DESIGN PREDICTIONS HAVE THE SAME STANDARD DEVIATION AS THE GOLD STANDARD MODEL PREDICTIONS.....                  | 19 |
| FIGURE S10. SCATTERPLOT OF CROSS-VALIDATED SHORT-TERM PREDICTIONS FOR 30 CAMPAIGNS VS THE GOLD STANDARD PREDICTIONS FOR NO <sub>x</sub> , NO, AND NO <sub>2</sub> . SHOWING PREDICTIONS BELOW 80 PPB FOR CLARITY (SEE SI FIGURE S12 AND TABLE S6 FOR PREDICTIONS EXCLUDED). ....                                                                                                                  | 20 |

FIGURE S11. BEST FIT LINES OF CROSS-VALIDATED SHORT-TERM PREDICTIONS FOR 30 CAMPAIGNS VS THE GOLD STANDARD PREDICTIONS FOR NO<sub>x</sub>, NO, AND NO<sub>2</sub>. ..... 21

FIGURE S12. PREDICTIONS ABOVE 80 PPB EXCLUDED FROM PREDICTION PLOTS, IF NOTED. .... 22

FIGURE S13. SCATTERPLOTS AND BEST FIT LINES OF CROSS-VALIDATED SHORT-TERM PREDICTIONS FOR 30 CAMPAIGNS VS TRUE AVERAGE CONCENTRATIONS FOR NO<sub>x</sub>. THIN TRANSPARENT LINES ARE INDIVIDUAL CAMPAIGNS, COLORED BY DESIGN VERSION; THICKER LINES ARE THE OVERALL VERSION TREND. (ONE PREDICTION IS EXCLUDED FOR CLARITY FROM THE RUSH HOURS VERSION 4 SCATTERPLOT AT X=24 PPB, Y=109 PPB [SITE 60731016] BUT IS INCLUDED IN THE LINE PLOTS). ..... 24

FIGURE S14. SITE-SPECIFIC NO<sub>x</sub> PREDICTION BIASES FOR SHORT-TERM DESIGNS (N = 30 CAMPAIGNS) AS COMPARED TO THE GOLD STANDARD (LONG-TERM BALANCED DESIGN VERSION 1) PREDICTIONS FOR ALL SITES. SITES ARE ARRANGED BY THE TRUE NO<sub>x</sub> MEASUREMENT, WITH HIGHER CONCENTRATION SITES HIGHER UP. ONE PREDICTION BIAS FOR SITE 60731016 IS EXCLUDED (86 PPB FOR RUSH HOURS VERSION 4) FOR CLARITY. .... 26

FIGURE S15. NO<sub>2</sub> MODEL PERFORMANCES ( $R^2_{MSE}$ ,  $R^2_{REG}$ , AND RMSE), AS DETERMINED BY EACH CAMPAIGN'S CROSS-VALIDATED PREDICTIONS RELATIVE TO: A) THE TRUE AVERAGES (LONG-TERM BALANCED VERSION 1), AND B) ITS CAMPAIGN AVERAGES. BOXPLOTS ARE FOR SHORT-TERM APPROACHES (30 CAMPAIGNS), WHILE SQUARES ARE FOR LONG-TERM APPROACHES (1 CAMPAIGN). .... 27

FIGURE S16. NO MODEL PERFORMANCES ( $R^2_{MSE}$ ,  $R^2_{REG}$ , AND RMSE), AS DETERMINED BY EACH CAMPAIGN'S CROSS-VALIDATED PREDICTIONS RELATIVE TO: A) THE TRUE AVERAGES (LONG-TERM BALANCED VERSION 1), AND B) ITS RESPECTIVE CAMPAIGN AVERAGES. BOXPLOTS ARE FOR SHORT-TERM APPROACHES (30 CAMPAIGNS), WHILE SQUARES ARE FOR LONG-TERM APPROACHES (1 CAMPAIGN). A FEW INFLUENTIAL OUTLIERS INFLUENCED THESE PERFORMANCE STATISTICS MORE SO THAN FOR NO<sub>x</sub> AND NO<sub>2</sub>. .. 28

## List of Equations

EQUATION 1. MEAN SQUARED ERROR (MSE) DEFINITION. WHERE  $y_i, campaign$  IS THE PREDICTION FROM A CAMPAIGN FOR A GIVEN DESIGN VERSION;  $y_i, ref$  IS THE REFERENCE VALUE, EITHER THE TRUE ANNUAL AVERAGE OR THE ESTIMATED ANNUAL AVERAGE FROM THE SAME CAMPAIGN (THE TYPICAL APPROACH IN PRACTICE); AND  $n$  IS THE TOTAL NUMBER OF SITES. .... 9

EQUATION 2. ROOT MEAN SQUARED ERROR (RMSE) DEFINITION ..... 9

EQUATION 3. MSE-BASED  $R^2$  (RMSE2) DEFINITION. WHERE  $ycampaign$  IS THE AVERAGE ACROSS ALL N SITES FOR A GIVEN CAMPAIGN. .... 9

# 1 Methods

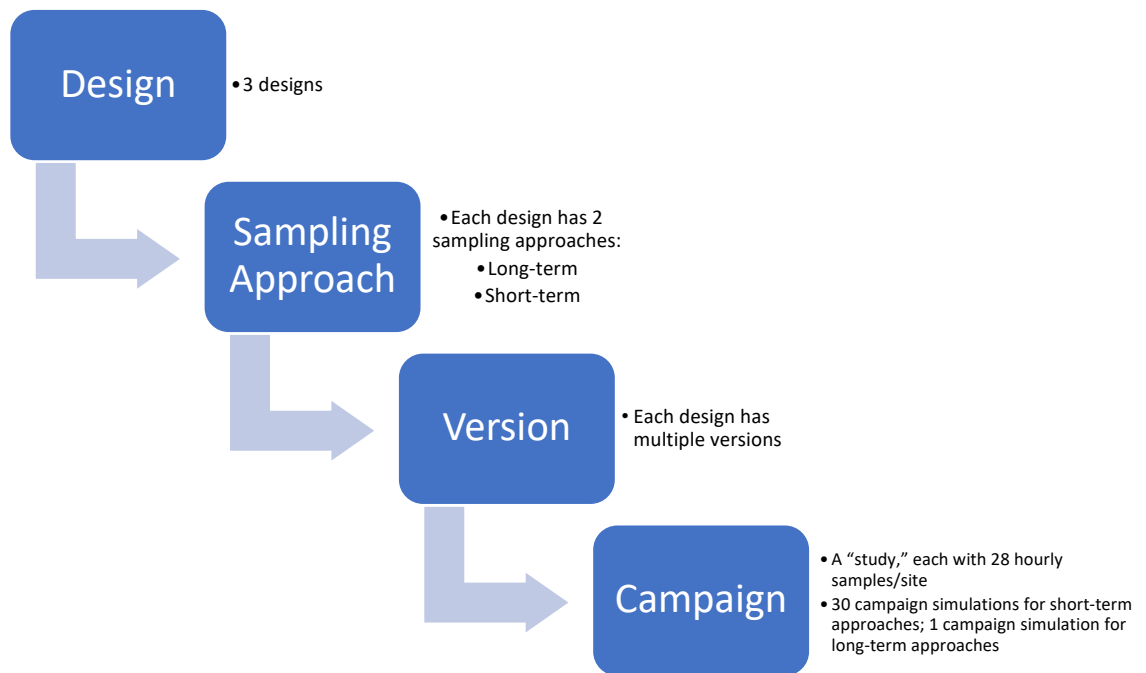

Figure S1. Hierarchical structure of simulations.

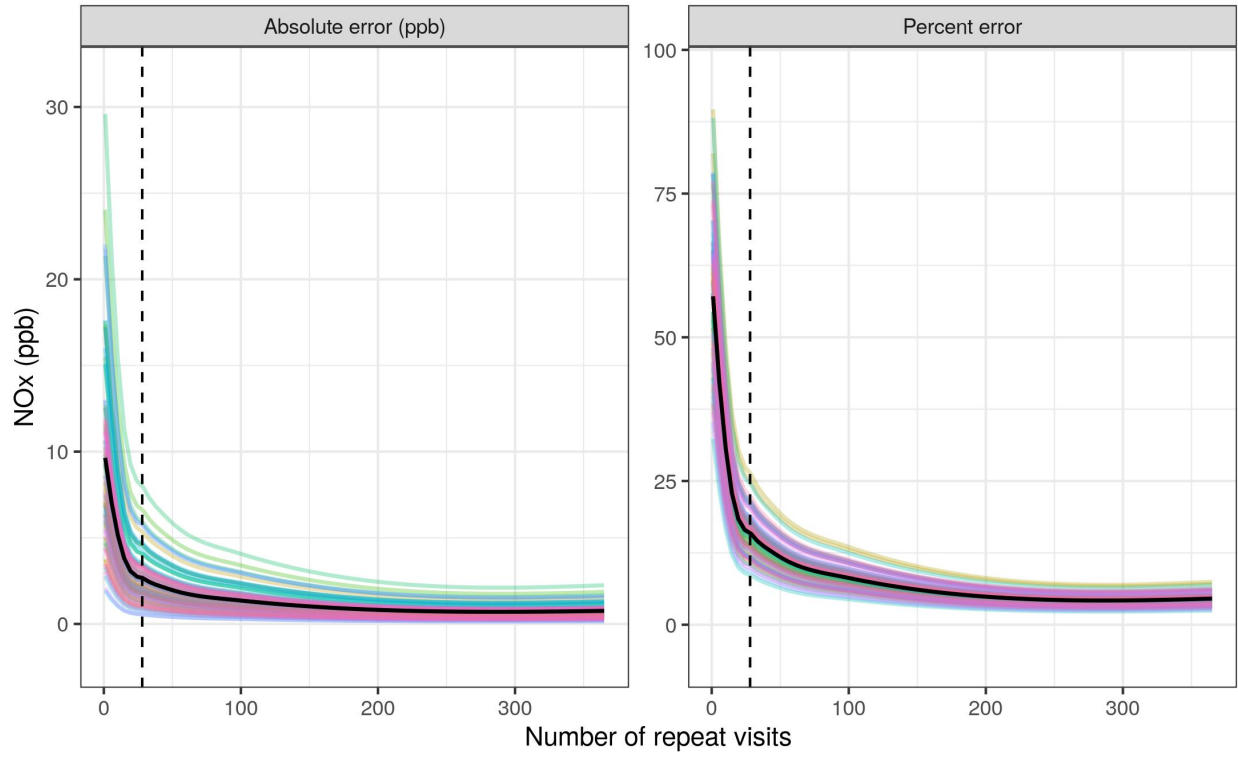

Figure S2. Loess lines for absolute and percent error of the NO<sub>x</sub> annual average (ppb), averaged across 10,000 random samples and 69 sites, by number of repeat visits. The colored curves are for individual sites, the black curve is the overall trend, and the dashed vertical line is for 28 repeat visits.

Table S1. Two-week sampling windows for the Rush Hours and Business Hours designs

| Version | Season | Start      | End        |
|---------|--------|------------|------------|
| 4       | summer | 2016-06-20 | 2016-07-03 |
| 4       | winter | 2016-02-27 | 2016-03-11 |
| 5       | summer | 2016-08-07 | 2016-08-20 |
| 5       | winter | 2016-01-15 | 2016-01-28 |
| 6       | spring | 2016-04-15 | 2016-04-28 |
| 6       | fall   | 2016-09-25 | 2016-10-08 |
| 7       | spring | 2016-05-15 | 2016-05-28 |
| 7       | fall   | 2016-11-24 | 2016-12-07 |

Table S2. Geocovariates and buffers included in PLS regression (n = 321)

| Kind                    | Covariate       | Buffers                                                                | Description                                                                                                            |
|-------------------------|-----------------|------------------------------------------------------------------------|------------------------------------------------------------------------------------------------------------------------|
| airports                | log_m_to_airp   |                                                                        | log meters to closest airport                                                                                          |
| airports                | log_m_to_l_airp |                                                                        | log meters to closest large airport                                                                                    |
| bus                     | log_m_to_bus    |                                                                        | log meters to closest bus route                                                                                        |
| coast                   | log_m_to_coast  |                                                                        | log meters to closest coastline                                                                                        |
| commercial and services | log_m_to_comm   |                                                                        | log meters to closest commercial and services area                                                                     |
| commercial and services | lu_comm_p       | 50, 100, 150, 300, 400, 500, 750, 1000, 1500, 3000, 5000, 10000, 15000 | proportion of commercial land use                                                                                      |
| elevation               | elev_above      | 1000, 5000                                                             | number of points (out of 24) more than 20 m and 50 m uphill of a location for a 1000 m and 5000 m buffer, respectively |

|                          |                |                                                    |                                                                                                                           |
|--------------------------|----------------|----------------------------------------------------|---------------------------------------------------------------------------------------------------------------------------|
| elevation                | elev_at_elev   | 1000, 5000                                         | number of points (out of 24) within 20 m and 50 m of the location' elevation for a 1000 m and 5000 m buffer, respectively |
| elevation                | elev_below     | 1000, 5000                                         | number of points (out of 24) more than 20 m and 50 m downhill of a location for a 1000 m and 5000 m buffer, respectively  |
| elevation                | elev_elevation |                                                    | elevation above sea level in meters                                                                                       |
| emissions/air pollutants | em_CO_s        | 3000, 15000, 30000                                 | sum of major CO emissions from stacks                                                                                     |
| emissions/air pollutants | em_NOx_s       | 3000, 15000, 30000                                 | sum of major NOx emissions from stacks                                                                                    |
| emissions/air pollutants | em_PM10_s      | 3000, 15000, 30000                                 | sum of major PM10 emissions from stacks                                                                                   |
| emissions/air pollutants | em_PM25_s      | 3000, 15000, 30000                                 | sum of major PM2.5 emissions from stacks                                                                                  |
| emissions/air pollutants | em_SO2_s       | 3000, 15000, 30000                                 | sum of major SO2 emissions from stacks                                                                                    |
| emissions/air pollutants | no2_behr_2005  |                                                    | Columnar NO2 for 2005                                                                                                     |
| emissions/air pollutants | no2_behr_2006  |                                                    | Columnar NO2 for 2006                                                                                                     |
| emissions/air pollutants | no2_behr_2007  |                                                    | Columnar NO2 for 2007                                                                                                     |
| imperviousness           | imp_a          | 50, 100, 150, 300, 400, 500, 750, 1000, 3000, 5000 | average imperviousness                                                                                                    |
| land use                 | lu_bays_p      | 3000, 5000, 10000, 15000                           | proportion of land with bays and estuaries                                                                                |

|          |                 |                                                                                 |                                                                    |
|----------|-----------------|---------------------------------------------------------------------------------|--------------------------------------------------------------------|
| land use | lu_crop_p       | 100, 150, 300, 400,<br>500, 750, 1000,<br>1500, 3000, 5000,<br>10000, 15000     | proportion of cultivated crops such as orchards, vineyards, grains |
| land use | lu_green_p      | 750, 1000, 1500,<br>3000, 5000, 10000,<br>15000                                 | proportion of evergreen forest land                                |
| land use | lu_grove_p      | 750, 1000, 1500,<br>3000, 5000, 10000,<br>15000                                 | proportion of orchards, groves, vineyards, nurseries               |
| land use | lu_herb_range_p | 1000, 1500, 3000,<br>5000, 10000, 15000                                         | proportion of herbaceous rangeland                                 |
| land use | lu_industrial_p | 150, 300, 400, 500,<br>750, 1000, 1500,<br>3000, 5000, 15000                    | proportion of industrial land use                                  |
| land use | lu_mine_p       | 3000, 5000, 10000                                                               | proportion of land with strip mines, quarries, and gravel pits     |
| land use | lu_mix_forest_p | 10000, 15000                                                                    | proportion of mixed forest land                                    |
| land use | lu_mix_range_p  | 1500, 3000, 5000,<br>10000                                                      | proportion of mixed rangeland                                      |
| land use | lu_mix_urban_p  | 150, 300, 400, 500,<br>750, 1000, 1500                                          | proportion of mixed urban or built-up land                         |
| land use | lu_oth_urban_p  | 400, 500, 750, 1000,<br>1500, 5000                                              | proportion of other urban or built-up land                         |
| land use | lu_reservior_p  | 5000                                                                            | proportion of land with reservoiurs                                |
| land use | lu_resi_p       | 50, 100, 150, 300,<br>400, 500, 750, 1000,<br>1500, 3000, 5000,<br>10000, 15000 | Proportion of residential land use                                 |

---



|          |                    |                                                           |                                                                                                                                       |
|----------|--------------------|-----------------------------------------------------------|---------------------------------------------------------------------------------------------------------------------------------------|
| land use | lu_shrub_p         | 400, 500, 750, 1000,<br>1500, 3000, 5000,<br>10000, 15000 | proportion of shrubland                                                                                                               |
| land use | lu_transition_p    | 750, 1000, 1500                                           | proportion of transitional land use                                                                                                   |
| land use | lu_unspec_p        | 10000, 15000                                              | proportion of unspecified land use                                                                                                    |
| land use | rlu_barren_p       | 3000, 5000                                                | proportion of barren land                                                                                                             |
| land use | rlu_crop_p         | 750, 1000, 3000,<br>5000                                  | proportion of cropland and pasture<br>land                                                                                            |
| land use | rlu_dev_hi_p       | 50, 100, 150, 300,<br>400, 500, 750, 1000,<br>3000, 5000  | proportion of highly developed land<br>(e.g., commercial and services;<br>industrial; transportation,<br>communication and utilities) |
| land use | rlu_dev_lo_p       | 50, 100, 150, 300,<br>400, 500, 750, 1000,<br>3000, 5000  | proportion of low developed land<br>(e.g., residential)                                                                               |
| land use | rlu_dev_med_p      | 50, 100, 150, 300,<br>400, 500, 750, 1000,<br>3000, 5000  | proportion of medium developed land<br>(e.g., residential)                                                                            |
| land use | rlu_dev_open_p     | 50, 100, 150, 300,<br>400, 500, 750, 1000,<br>3000, 5000  | proportion of developed open land                                                                                                     |
| land use | rlu_grass_p        | 50, 100, 150, 300,<br>400, 500, 750, 1000,<br>3000, 5000  | proportion of grasslands, herbaceous<br>vegetation                                                                                    |
| land use | rlu_herb_wetland_p | 5000                                                      | proportion of herb (nonforested)<br>wetland                                                                                           |
| land use | rlu_mix_forest_p   | 3000, 5000                                                | proportion of mixed forest                                                                                                            |
| land use | rlu_pasture_p      | 1000, 3000, 5000                                          | proportion of pasture, hay land                                                                                                       |
| land use | rlu_shrub_p        | 400, 500, 750, 1000,<br>3000, 5000                        | proportion of shrubland                                                                                                               |

|                          |                   |                                                             |                                                                     |
|--------------------------|-------------------|-------------------------------------------------------------|---------------------------------------------------------------------|
| NDVI                     | ndvi_q25_a        | 250, 500, 1000,<br>2500, 5000, 7500,<br>10000               | NDVI (25th quantile)                                                |
| NDVI                     | ndvi_q50_a        | 250, 500, 1000,<br>2500, 5000, 7500,<br>10000               | NDVI (50th quantile)                                                |
| NDVI                     | ndvi_q75_a        | 250, 500, 1000,<br>2500, 5000, 7500,<br>10000               | NDVI (75th quantile)                                                |
| NDVI                     | ndvi_summer_a     | 250, 500, 1000,<br>2500, 5000, 7500,<br>10000               | average summer time NDVI                                            |
| NDVI                     | ndvi_winter_a     | 250, 500, 1000,<br>2500, 5000, 7500,<br>10000               | average winter time NDVI                                            |
| population               | pop_s             | 500, 1000, 1500,<br>2000, 2500, 3000,<br>5000, 10000, 15000 | 2000 population density                                             |
| port                     | log_m_to_s_port   |                                                             | log meters to closest small port                                    |
| port                     | lu_transport_p    | 300, 400, 500, 750,<br>1000, 1500, 3000,<br>5000            | proportion of transportation,<br>communications, and utilities land |
| railroads, rail<br>yards | log_m_to_rr       |                                                             | log meters to closest railroad                                      |
| railroads, rail<br>yards | log_m_to_ry       |                                                             | log meters to closest rail yard                                     |
| roads                    | intersect_a1_a1_s | 3000                                                        | intersect_a1_a1_s                                                   |
| roads                    | intersect_a1_a2_s | 3000                                                        | intersect_a1_a2_s                                                   |
| roads                    | intersect_a1_a3_s | 1000, 3000                                                  | number of a1-a3 road intersections                                  |
| roads                    | intersect_a2_a2_s | 3000                                                        | number of a2-a2 road intersections                                  |
| roads                    | intersect_a2_a3_s | 3000                                                        | number of a2-a3 road intersections                                  |

|              |                              |                                                                |                                                  |
|--------------|------------------------------|----------------------------------------------------------------|--------------------------------------------------|
| roads        | intersect_a3_a3_s            | 500, 1000, 3000                                                | number of a3-a3 road intersections               |
| roads        | ll_a1_s                      | 500, 750, 1000,<br>1500, 3000, 5000                            | length of a1 roads                               |
| roads        | ll_a2_s                      | 1500, 3000, 5000                                               | length of a2 roads                               |
| roads        | ll_a3_s                      | 50, 100, 150, 300,<br>400, 500, 750, 1000,<br>1500, 3000, 5000 | length of a3 roads                               |
| roads        | log_m_to_a1                  |                                                                | log meters to closest a1 road                    |
| roads        | log_m_to_a1_a1_i<br>ntersect |                                                                | log meters to closest a1-a1 road<br>intersection |
| roads        | log_m_to_a1_a2_i<br>ntersect |                                                                | log_m_to_a1_a2_intersect                         |
| roads        | log_m_to_a1_a3_i<br>ntersect |                                                                | log meters to closest a1-a3 road<br>intersection |
| roads        | log_m_to_a2                  |                                                                | log meters to closest a2 road                    |
| roads        | log_m_to_a2_a2_i<br>ntersect |                                                                | log meters to closest a2-a2 road<br>intersection |
| roads        | log_m_to_a2_a3_i<br>ntersect |                                                                | log meters to closest a2-a3 road<br>intersection |
| roads        | log_m_to_a3                  |                                                                | log meters to closest a3 road                    |
| roads        | log_m_to_a3_a3_i<br>ntersect |                                                                | log meters to closest a3-a3 road<br>intersection |
| truck routes | log_m_to_truck               |                                                                | log meters to closest truck route                |
| truck routes | tl_s                         | 750, 1000, 1500,<br>3000, 5000, 10000,<br>15000                | length of truck routes                           |
| water        | log_m_to_waterwa<br>y        |                                                                | log meters to closest waterway                   |
| water        | rlu_water_p                  | 3000, 5000                                                     | proportion of water                              |

$$MSE_{ref} = \frac{1}{n} \sum_{i=1}^n (y_{i,ref} - \hat{y}_{i,campaign})^2$$

Equation 1. Mean squared error (MSE) definition. Where  $\hat{y}_{i,campaign}$  is the prediction from a campaign for a given design version;  $y_{i,ref}$  is the reference value, either the true annual average or the estimated annual average from the same campaign (the typical approach in practice); and  $n$  is the total number of sites.

$$RMSE_{ref} = \sqrt{MSE_{ref}}$$

Equation 2. Root mean squared error (RMSE) definition

$$R_{MSE}^2 = \max \left( 0, 1 - \frac{MSE_{ref}}{\frac{1}{n} \sum_{i=1}^n (y_{i,ref} - \bar{y}_{campaign})^2} \right)$$

Equation 3. MSE-based  $R^2$  ( $R_{MSE}^2$ ) definition. Where  $\bar{y}_{campaign}$  is the average across all  $n$  sites for a given campaign.

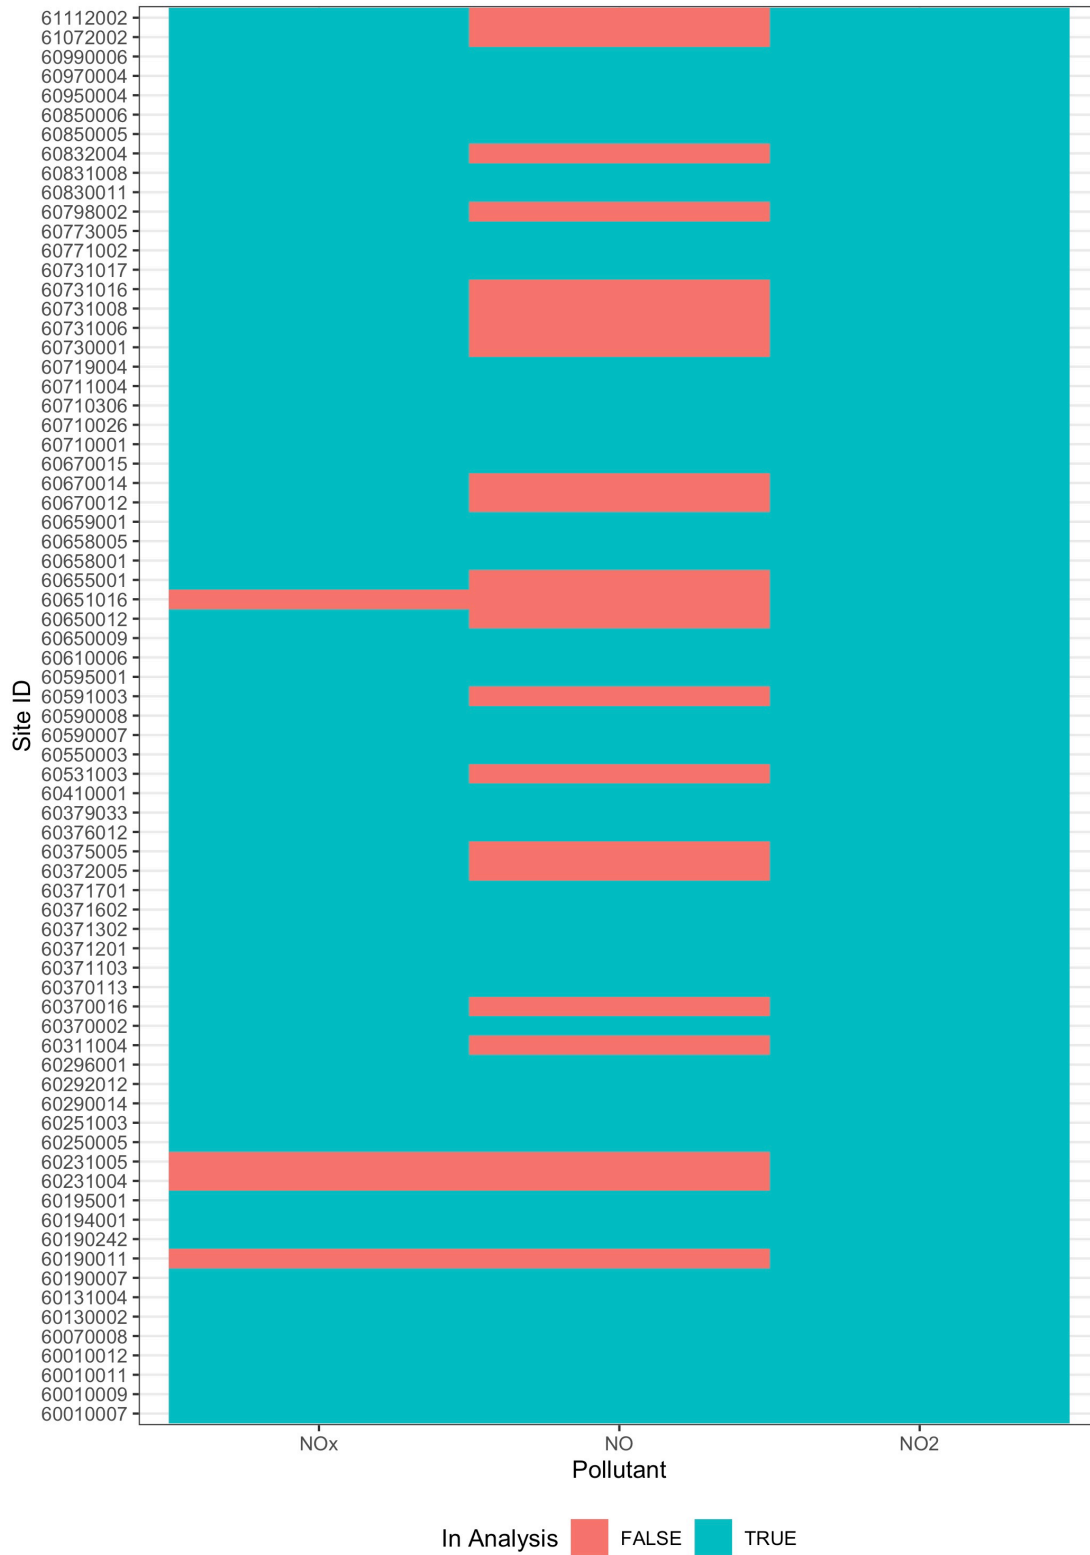

Figure S3. AQS sites included in the analysis of each pollutant (N=69 NOx, 51 NO, 73 NO<sub>2</sub>). Site ID is a compilation of the CA state ID (6, the first digit), county ID (next 3 digits), and AQS site ID (last 4 digits).

## 2 Hourly Readings

Table S3. Distribution of the number of hourly and day equivalent (24 samples/day) observations per site<sup>1</sup>

| Parameter Name                      | Count          | N  | Min   | Mean  | SD  | Median | IQR | Max   |
|-------------------------------------|----------------|----|-------|-------|-----|--------|-----|-------|
| Oxides of nitrogen (NOx)            | Day Equivalent | 69 | 285   | 337   | 15  | 343    | 17  | 355   |
| Oxides of nitrogen (NOx)            | Hours          | 69 | 6,836 | 8,090 | 361 | 8,236  | 408 | 8,510 |
| Nitric oxide (NO)                   | Day Equivalent | 51 | 294   | 338   | 14  | 342    | 14  | 355   |
| Nitric oxide (NO)                   | Hours          | 51 | 7,060 | 8,119 | 339 | 8,216  | 346 | 8,510 |
| Nitrogen dioxide (NO <sub>2</sub> ) | Day Equivalent | 73 | 284   | 337   | 15  | 343    | 17  | 355   |
| Nitrogen dioxide (NO <sub>2</sub> ) | Hours          | 73 | 6,825 | 8,077 | 363 | 8,231  | 408 | 8,510 |

<sup>1</sup> N = number of sites.

Table S4. Distribution of hourly concentrations (ppb)<sup>1</sup>

| Parameter Name                      | N       | Min | Mean | SD | Median | IQR | Max |
|-------------------------------------|---------|-----|------|----|--------|-----|-----|
| Oxides of nitrogen (NOx)            | 558,207 | -5  | 16   | 21 | 9      | 16  | 427 |
| Nitric oxide (NO)                   | 414,046 | -5  | 9    | 16 | 4      | 5   | 381 |
| Nitrogen dioxide (NO <sub>2</sub> ) | 589,625 | -3  | 10   | 10 | 7      | 12  | 97  |

<sup>1</sup> N = total number of hourly readings.

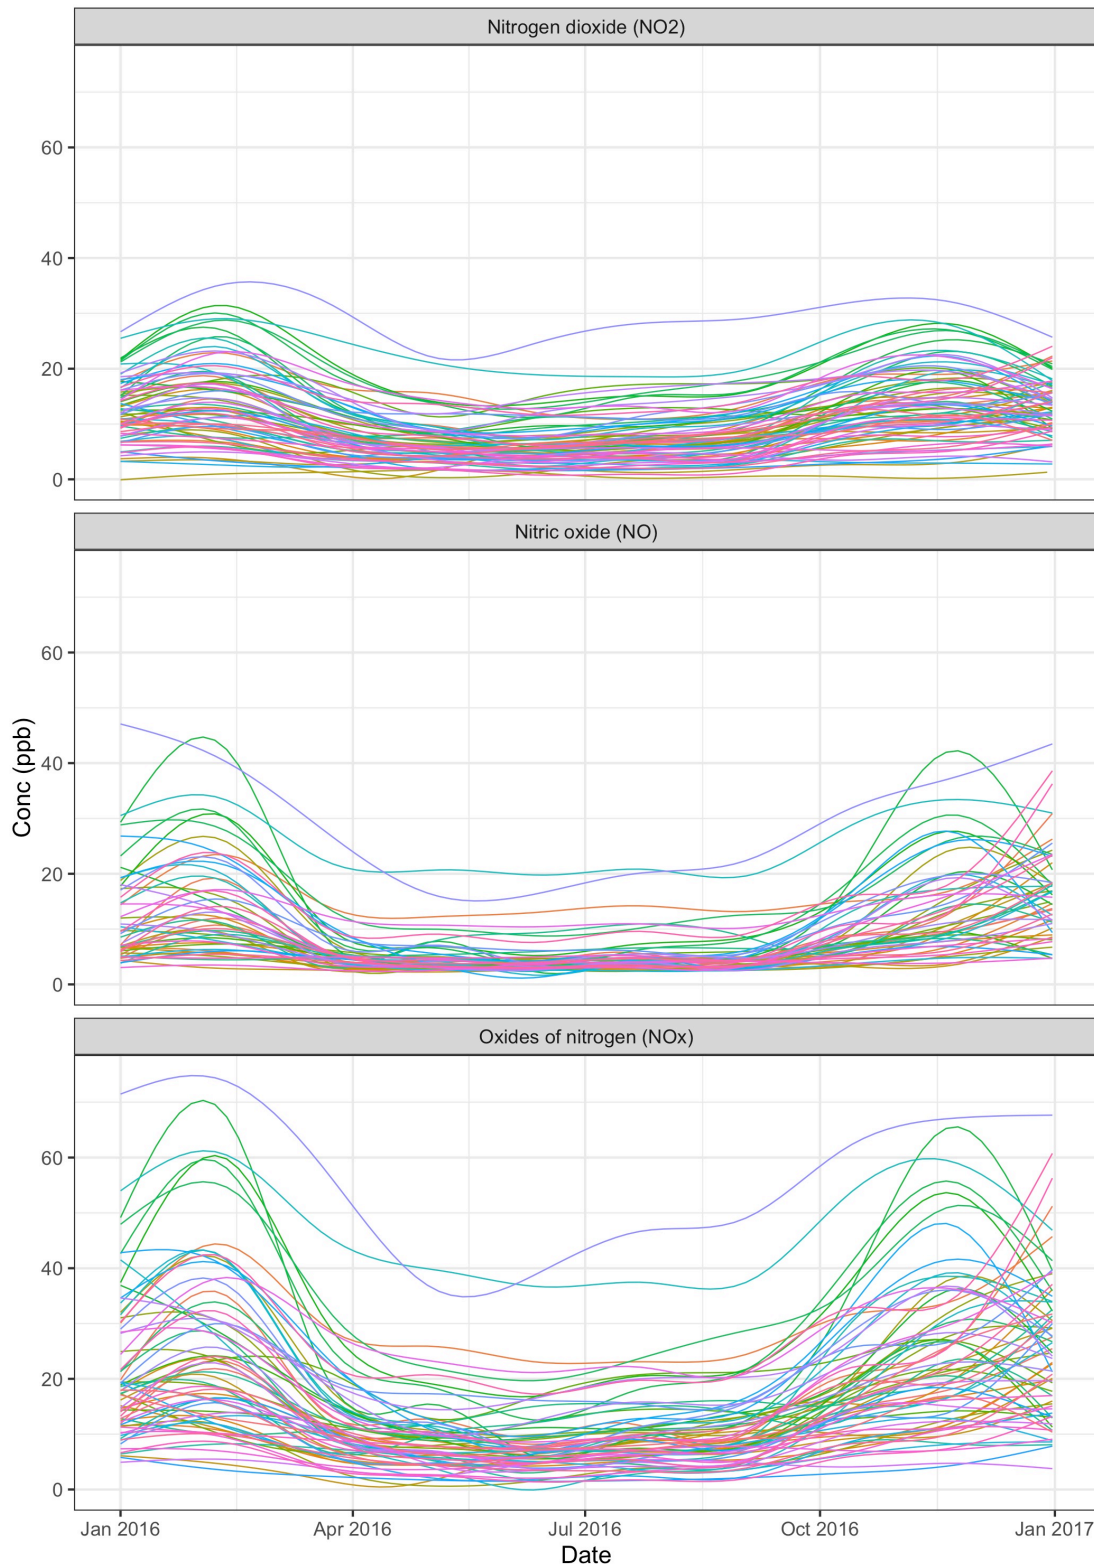

Figure S4. Concentration trends for NO<sub>x</sub>, NO, and NO<sub>2</sub> over the course of 2016 at AQS sites included in this study (N=69 NO<sub>x</sub>, 51 NO, 73 NO<sub>2</sub>). Colored lines are individual sites.

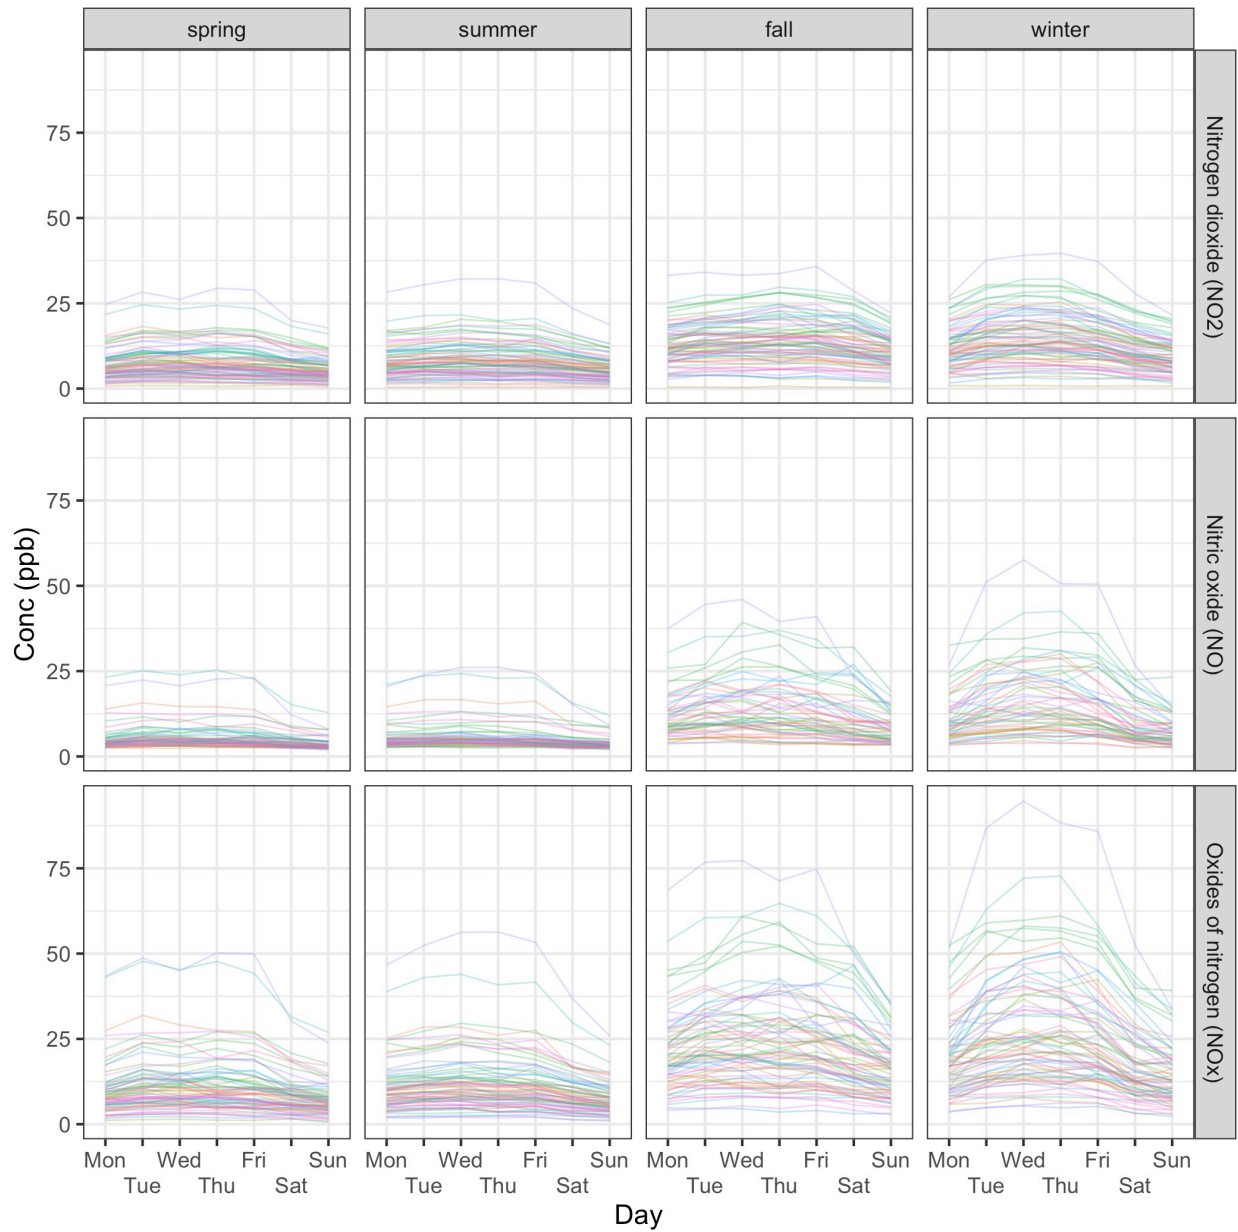

Figure S5. Concentration trends for NO<sub>x</sub>, NO, and NO<sub>2</sub> by day and season at AQS sites included in this study (N=69 NO<sub>x</sub>, 51 NO, 73 NO<sub>2</sub>). Colored lines are individual sites.



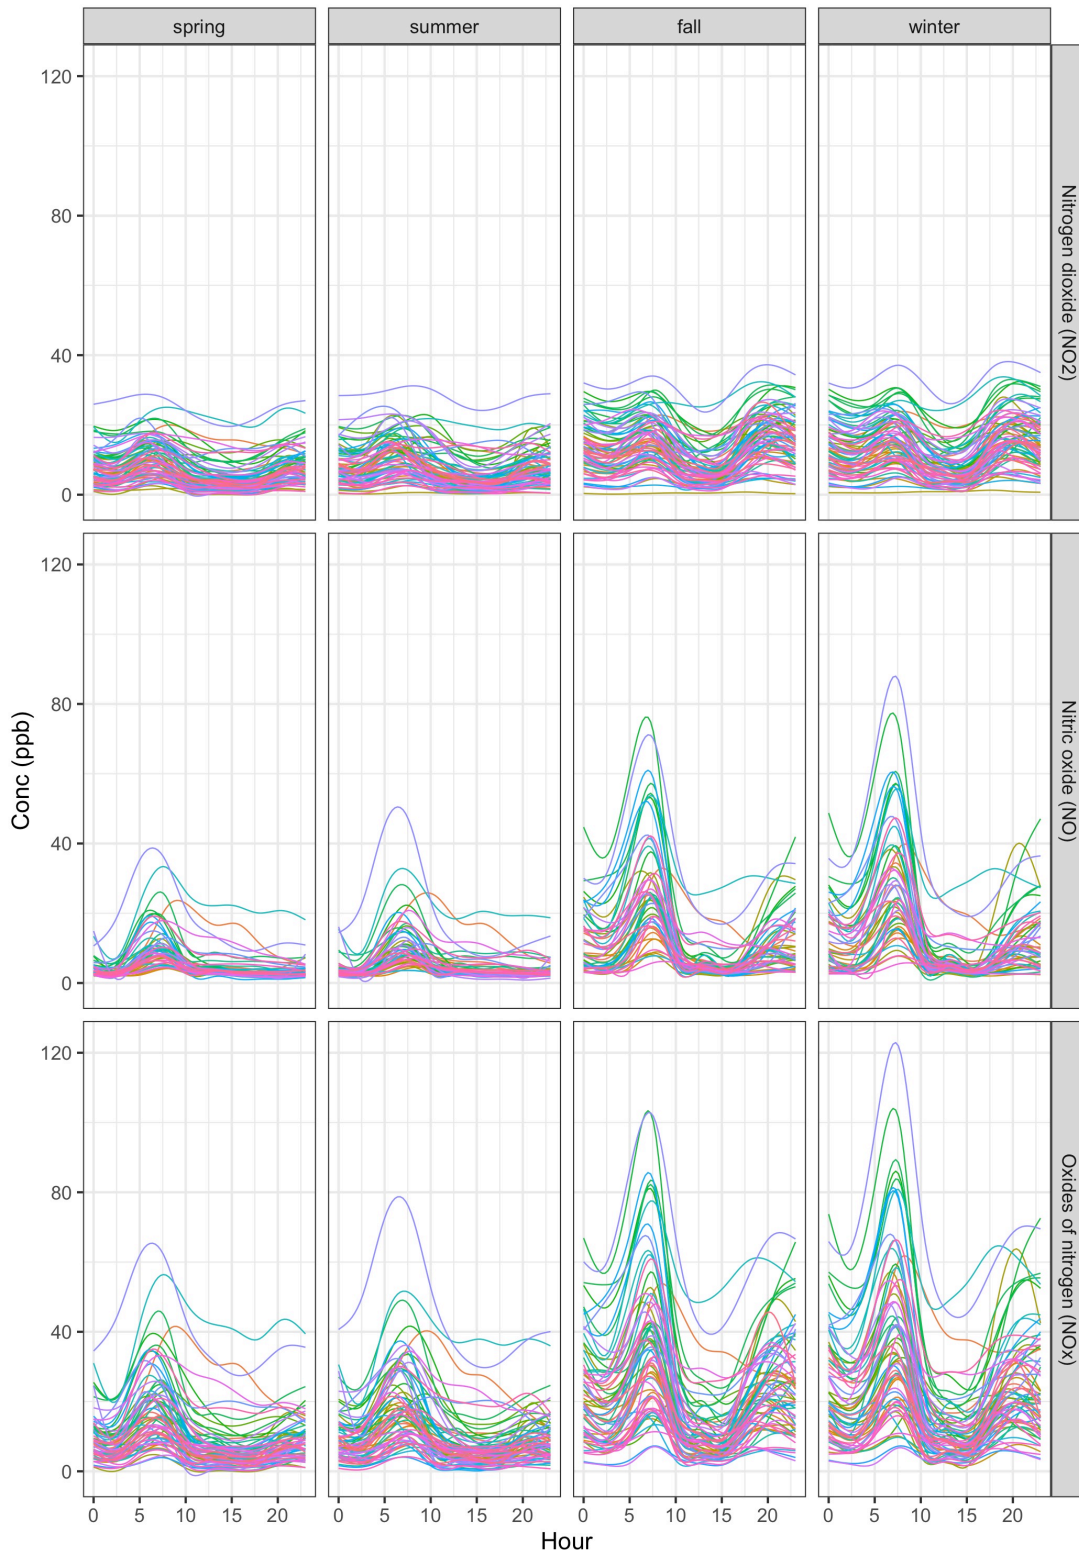

Figure S6. Concentration trends for NO<sub>x</sub>, NO, and NO<sub>2</sub> by hour and season at AQS sites included in this study (N=69 NO<sub>x</sub>, 51 NO, 73 NO<sub>2</sub>). Colored lines are individual sites.

### 3 Annual Average Estimates

Table S5. Distribution of annual average NOx estimates from various sampling approaches.<sup>1</sup>

| <b>Design</b> | <b>Version</b>      | <b>Type</b> | <b>N</b> | <b>Min</b> | <b>Q25</b> | <b>Q50</b> | <b>Q75</b> | <b>Max</b> | <b>SD</b> |
|---------------|---------------------|-------------|----------|------------|------------|------------|------------|------------|-----------|
| Balanced      | All Hours (V1)      | Long-Term   | 69       | 3.0        | 9.8        | 14.2       | 20.8       | 55.6       | 9.8       |
| Balanced      | All Hours (V1)      | Short-Term  | 2070     | 1.9        | 9.2        | 13.7       | 21.2       | 69.5       | 10.3      |
| Balanced      | Most Hours (V2)     | Long-Term   | 69       | 3.2        | 9.9        | 14.1       | 20.7       | 55.4       | 9.9       |
| Balanced      | Most Hours (V2)     | Short-Term  | 2070     | 2.1        | 9.4        | 13.9       | 20.9       | 70.8       | 10.3      |
| Balanced      | Truncated (V3)      | Long-Term   | 69       | 3.4        | 10.4       | 14.4       | 21.0       | 55.7       | 10.1      |
| Balanced      | Truncated (V3)      | Short-Term  | 2070     | 2.1        | 9.8        | 14.7       | 21.4       | 66.9       | 10.6      |
| Rush Hours    | Winter, Summer (V4) | Long-Term   | 69       | 3.5        | 8.3        | 12.1       | 19.4       | 67.1       | 12.0      |
| Rush Hours    | Winter, Summer (V4) | Short-Term  | 2070     | 2.2        | 8.2        | 12.2       | 19.8       | 78.2       | 12.0      |
| Rush Hours    | Winter, Summer (V5) | Long-Term   | 69       | 4.6        | 12.3       | 18.8       | 29.6       | 75.9       | 14.5      |
| Rush Hours    | Winter, Summer (V5) | Short-Term  | 2070     | 3.1        | 12.0       | 18.1       | 29.0       | 95.7       | 14.8      |
| Rush Hours    | Spring, Fall (V6)   | Long-Term   | 69       | 3.1        | 10.4       | 13.6       | 20.4       | 58.8       | 11.3      |
| Rush Hours    | Spring, Fall (V6)   | Short-Term  | 2070     | 1.7        | 9.4        | 13.7       | 20.7       | 70.8       | 11.7      |
| Rush Hours    | Spring, Fall (V7)   | Long-Term   | 69       | 4.4        | 10.6       | 15.7       | 20.2       | 55.7       | 10.0      |
| Rush Hours    | Spring, Fall (V7)   | Short-Term  | 2070     | 2.3        | 10.4       | 15.3       | 20.9       | 69.5       | 10.4      |

|                |                     |            |      |     |     |      |      |      |      |
|----------------|---------------------|------------|------|-----|-----|------|------|------|------|
| Business Hours | Winter, Summer (V4) | Long-Term  | 69   | 1.6 | 5.5 | 8.1  | 12.8 | 54.6 | 10.6 |
| Business Hours | Winter, Summer (V4) | Short-Term | 2070 | 1.0 | 5.4 | 8.1  | 14.2 | 62.1 | 10.7 |
| Business Hours | Winter, Summer (V5) | Long-Term  | 69   | 3.1 | 8.0 | 11.9 | 20.5 | 65.2 | 12.0 |
| Business Hours | Winter, Summer (V5) | Short-Term | 2070 | 2.0 | 8.1 | 11.8 | 19.9 | 73.0 | 12.0 |
| Business Hours | Spring, Fall (V6)   | Long-Term  | 69   | 1.6 | 5.4 | 7.9  | 12.2 | 53.3 | 9.8  |
| Business Hours | Spring, Fall (V6)   | Short-Term | 2070 | 1.1 | 5.1 | 8.0  | 12.1 | 57.1 | 9.8  |
| Business Hours | Spring, Fall (V7)   | Long-Term  | 69   | 2.3 | 6.1 | 9.7  | 12.7 | 47.2 | 8.7  |
| Business Hours | Spring, Fall (V7)   | Short-Term | 2070 | 0.9 | 6.2 | 9.6  | 13.1 | 53.9 | 8.7  |

---

<sup>1</sup> N = Total number of sites x number of campaigns.

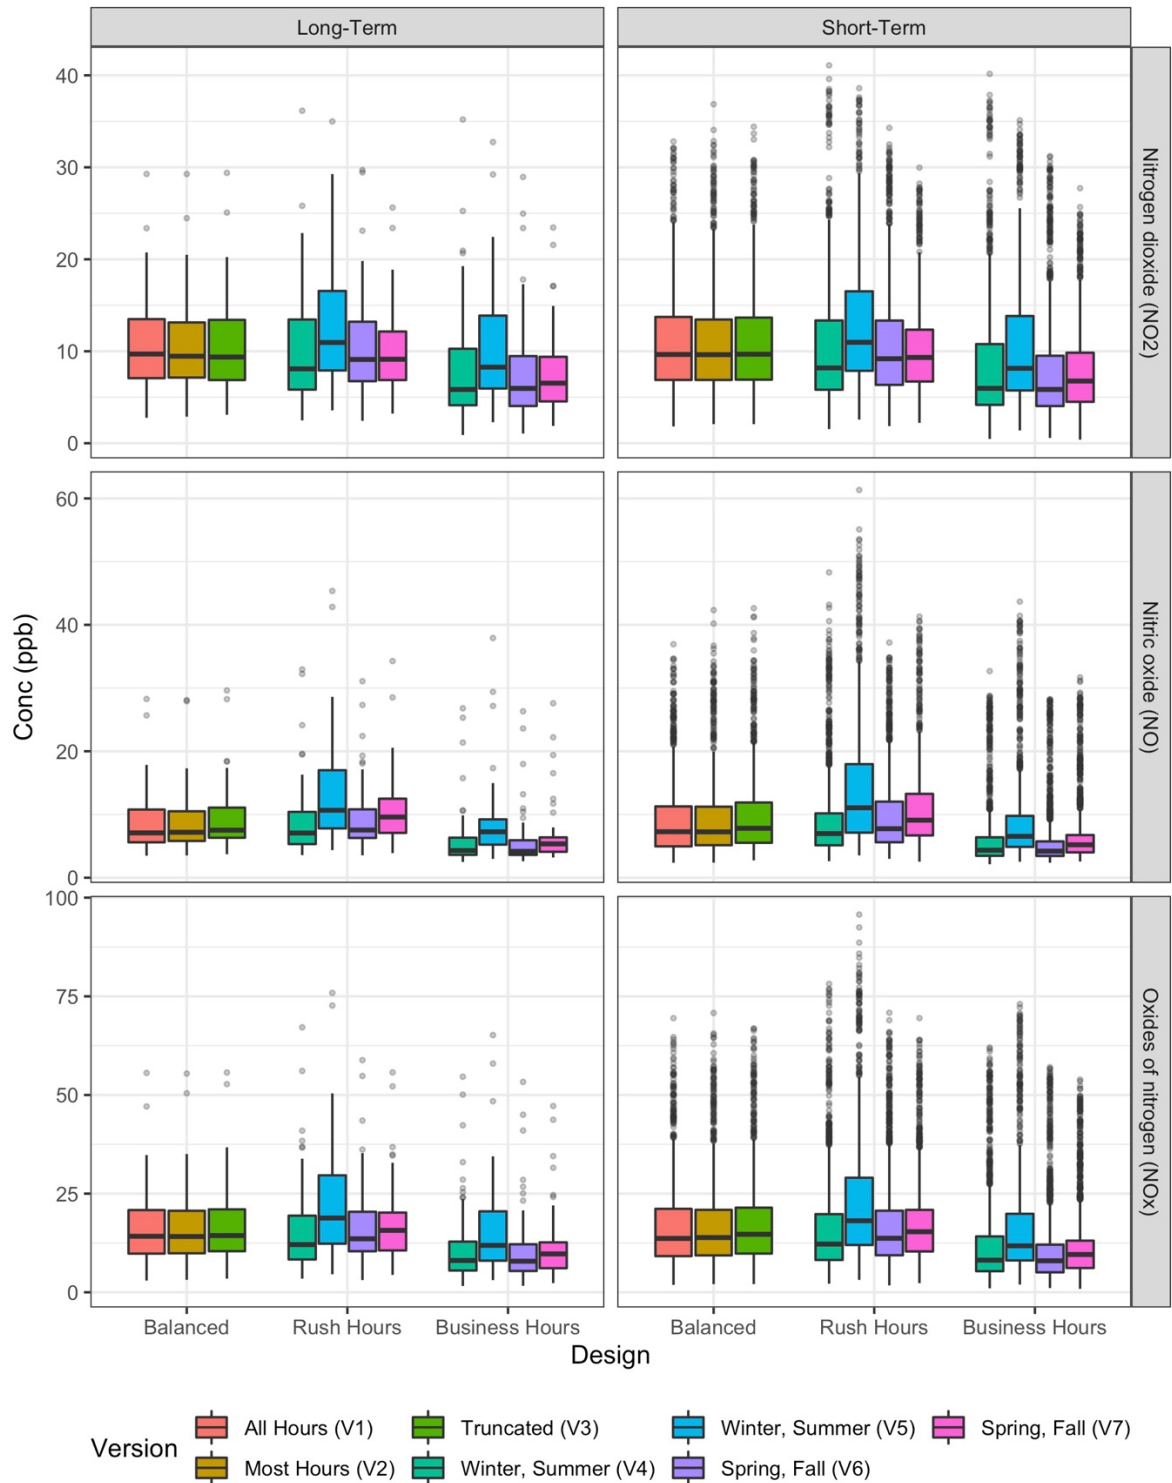

Figure S7. Annual average site concentration estimates for different pollutants and design versions.  $N=30$  campaigns per design version  $\times$  69 sites for short-term approaches;  $N = 1$  campaign per design version  $\times$  69 sites for long-term approaches. Short-term approaches appear to be more variable (less precise), in large part because all 30 campaigns are represented in the boxplots.

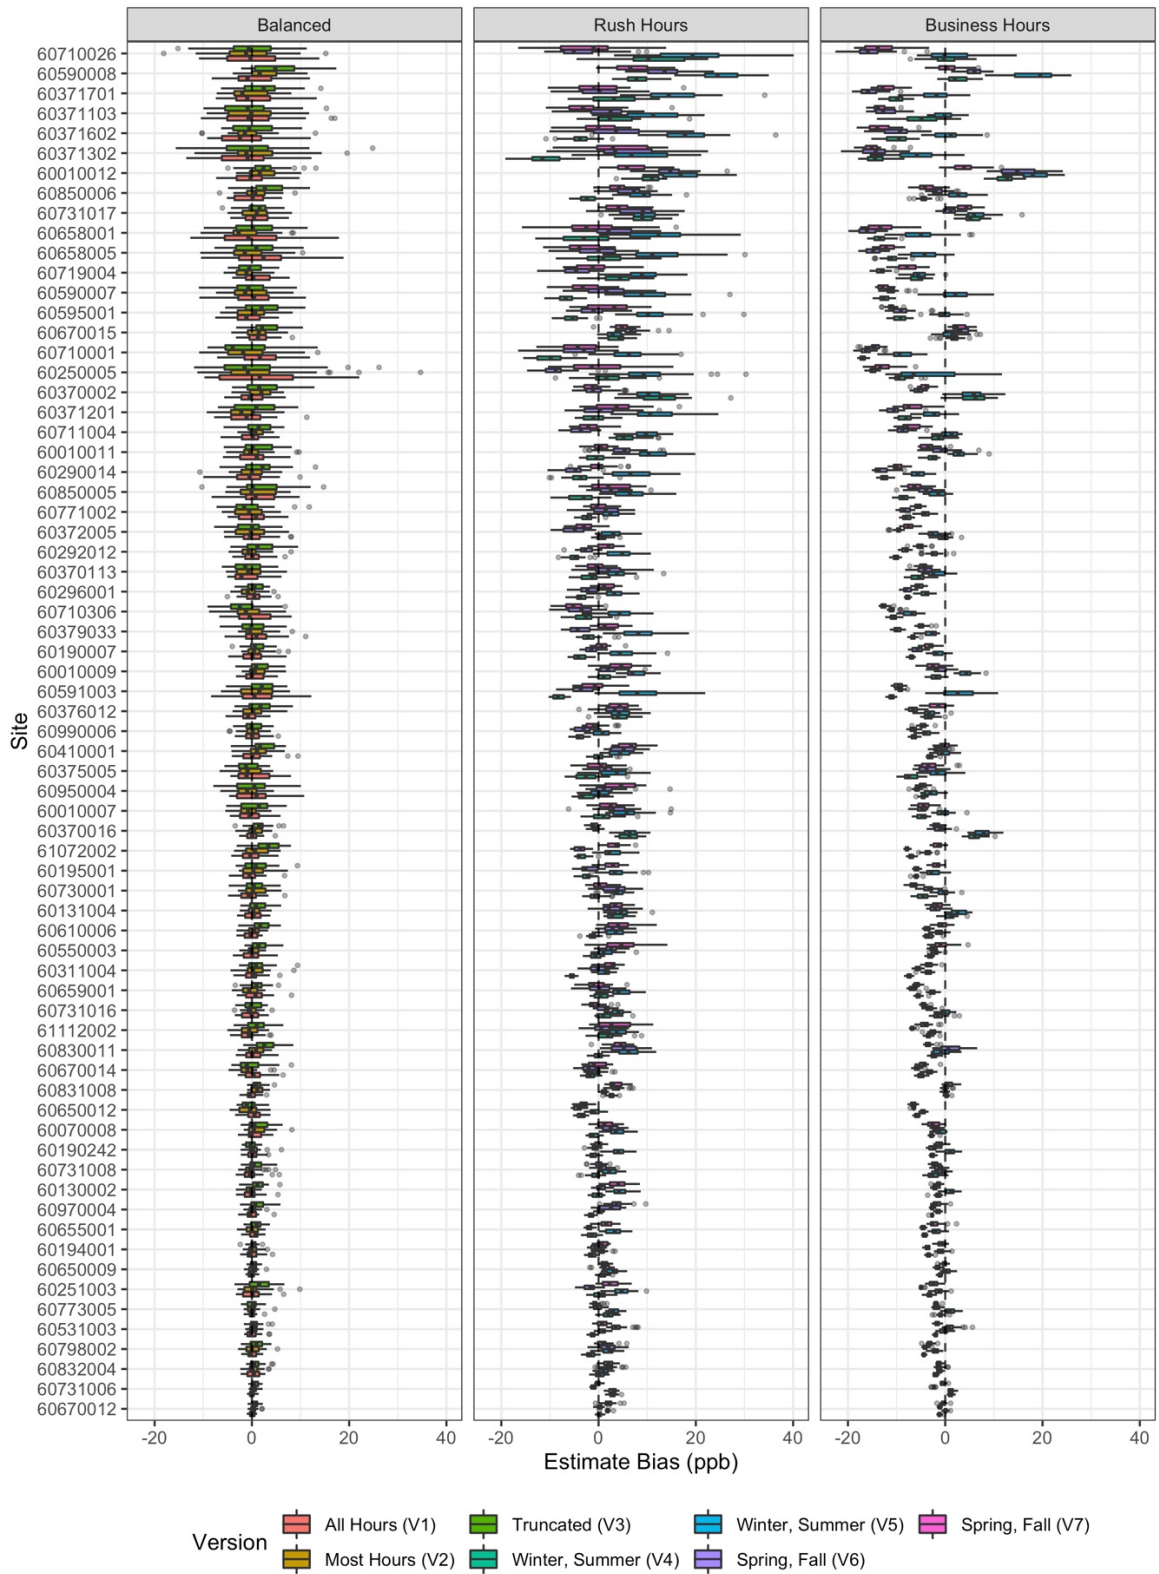

Figure S8. Site-specific NO<sub>x</sub> estimate biases for short-term designs (N = 30 campaigns) as compared to the true estimates (long-term Balanced Design Version 1). All sites are included. Sites are arranged by the true NO<sub>x</sub> average, with higher concentrations higher up.

## 4 Model Predictions

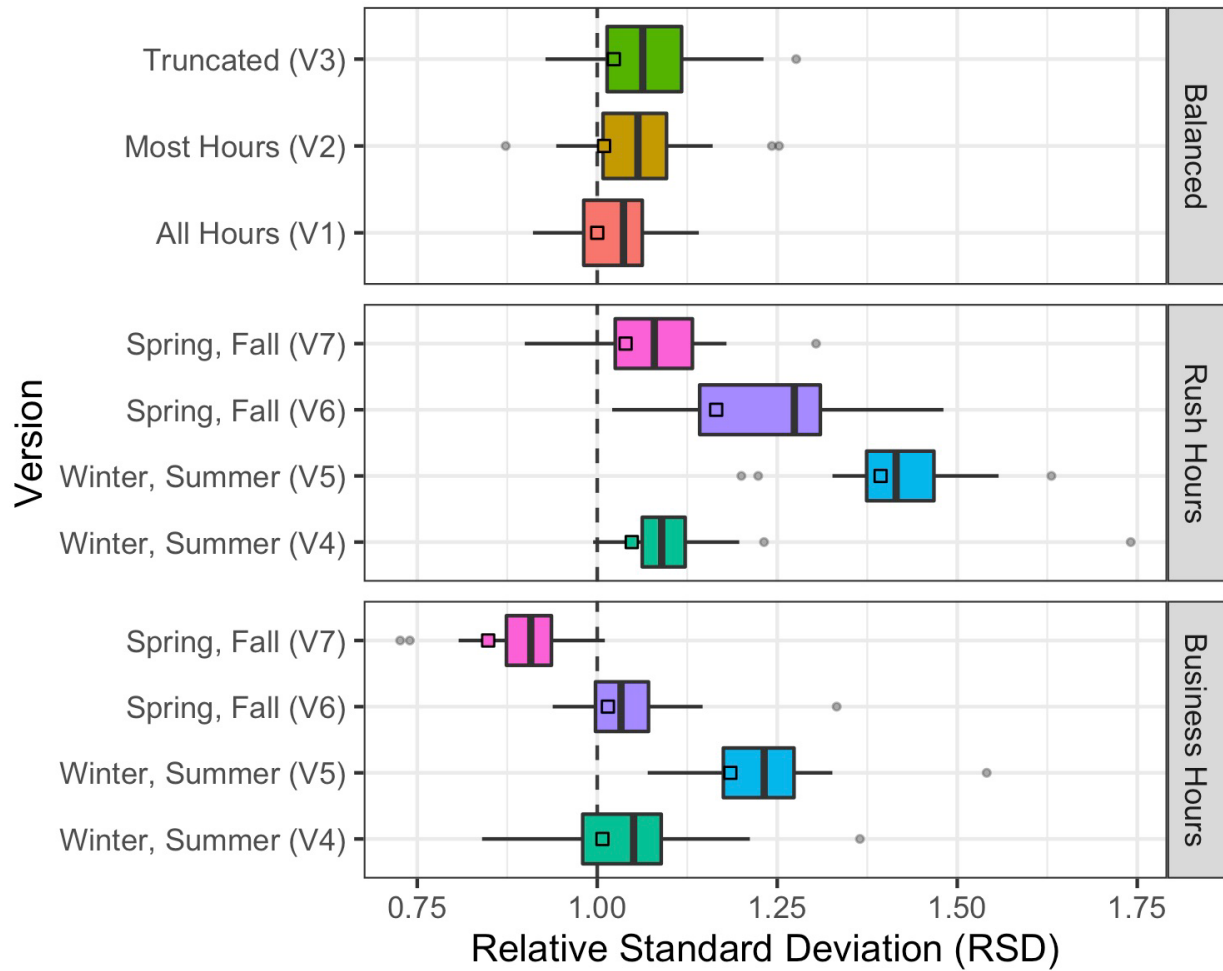

Figure S9. Variation of predictions across 69 sites by design relative to the gold standard predictions (relative standard deviation [RSD]). Boxplots are for short-term approaches (30 campaigns), squares are for long-term approaches (1 campaign). Values of 1 indicate that design predictions have the same standard deviation as the gold standard model predictions.

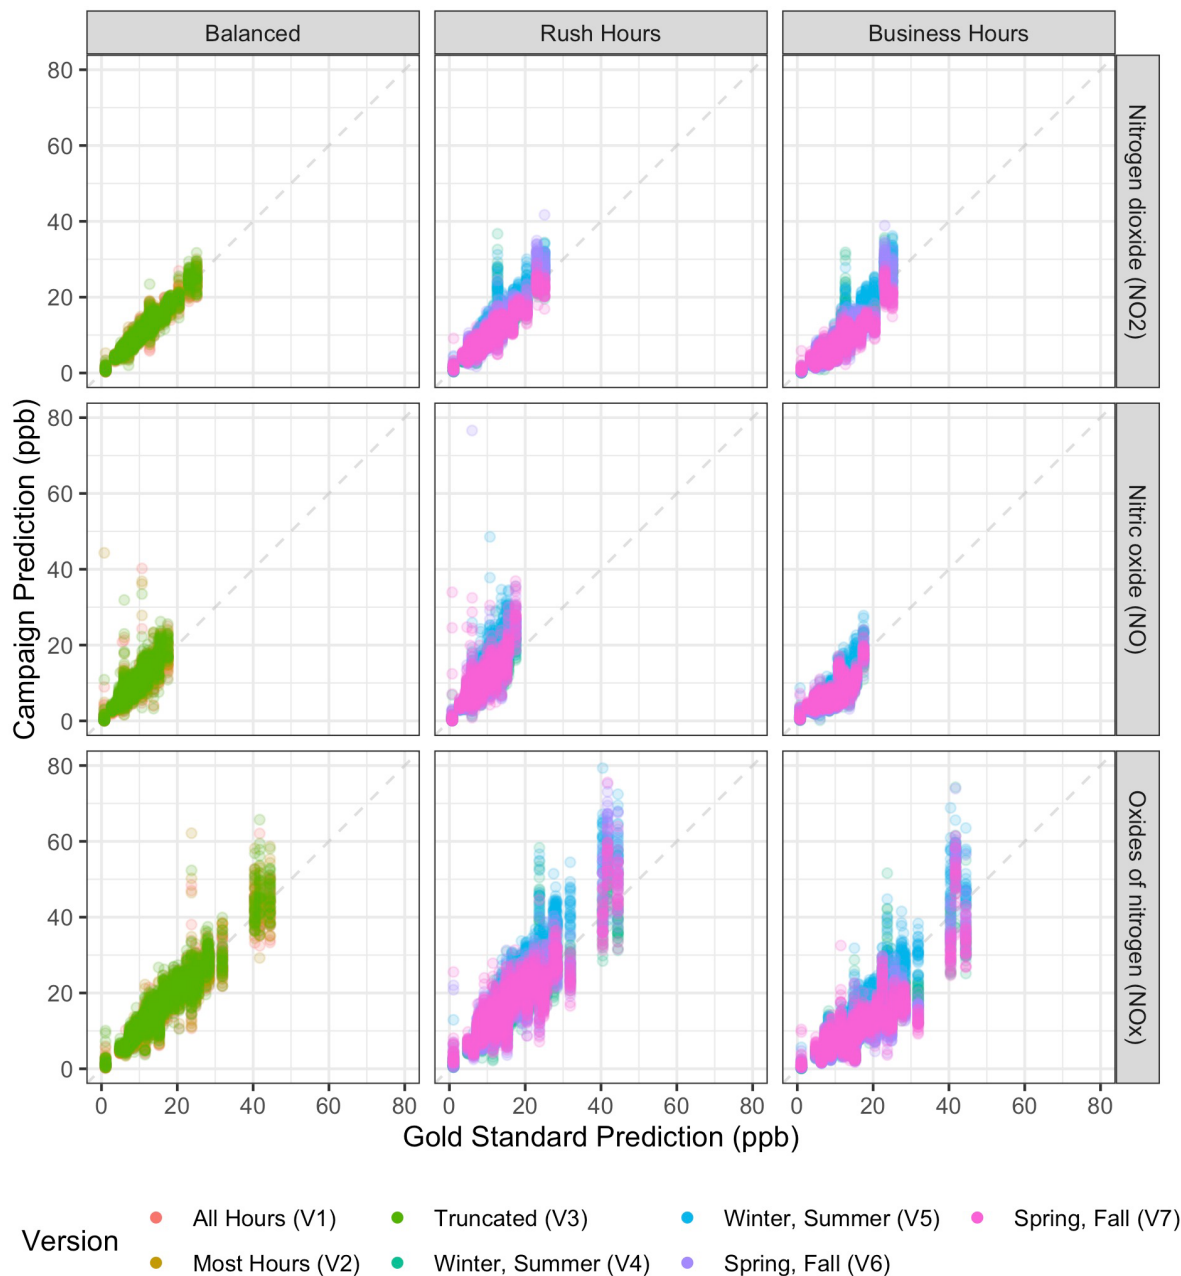

Figure S10. Scatterplot of cross-validated short-term predictions for 30 campaigns vs the gold standard predictions for NO<sub>x</sub>, NO, and NO<sub>2</sub>. Showing predictions below 80 ppb for clarity (see SI Figure S12 and Table S6 for predictions excluded).

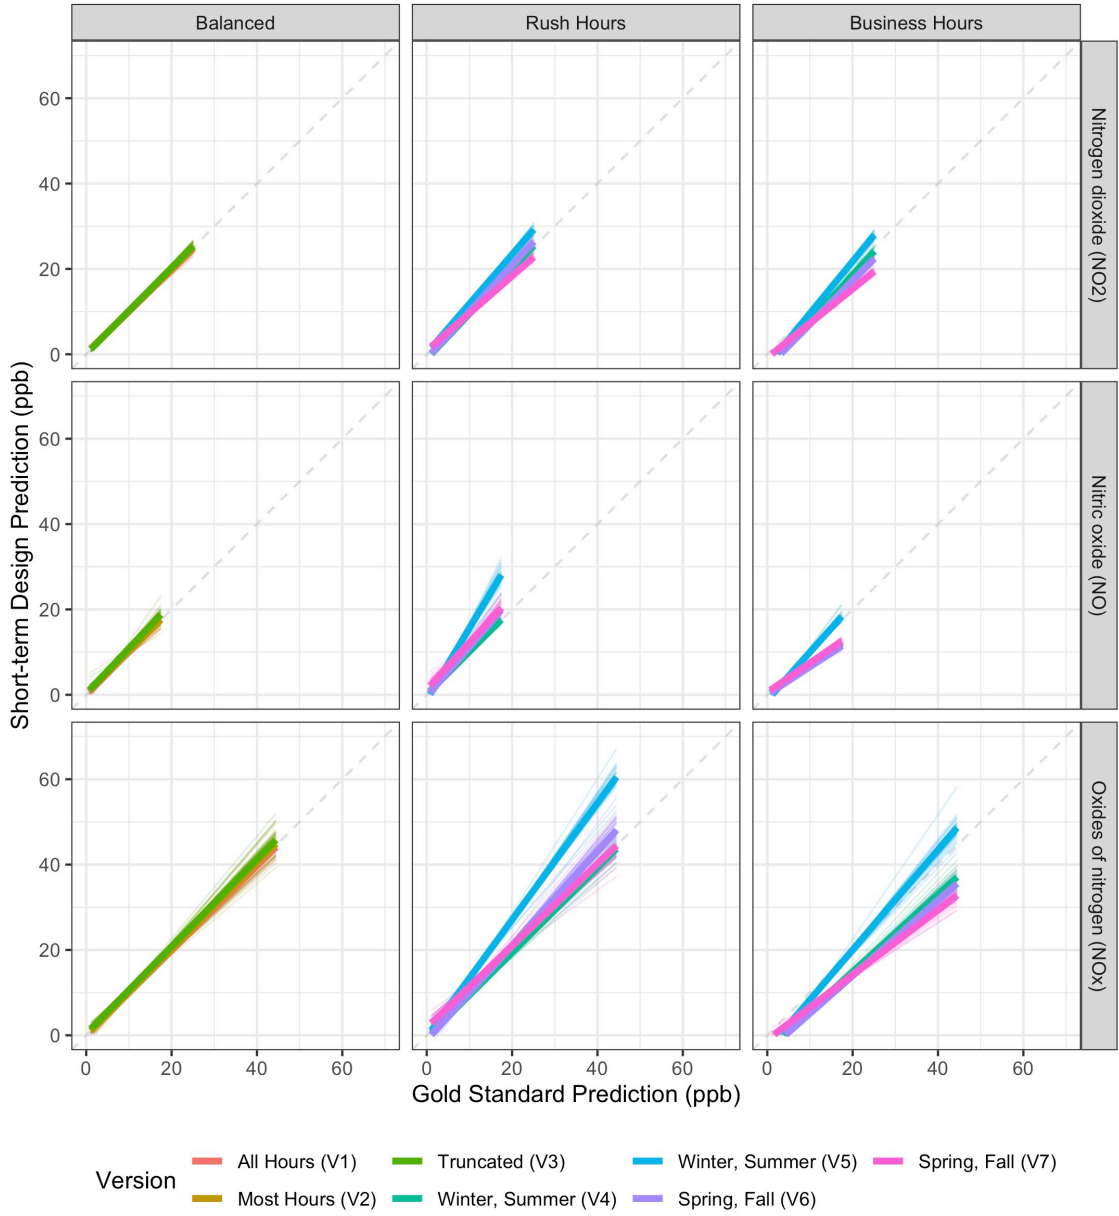

Figure S11. Best fit lines of cross-validated short-term predictions for 30 campaigns vs the gold standard predictions for NO<sub>x</sub>, NO, and NO<sub>2</sub>.



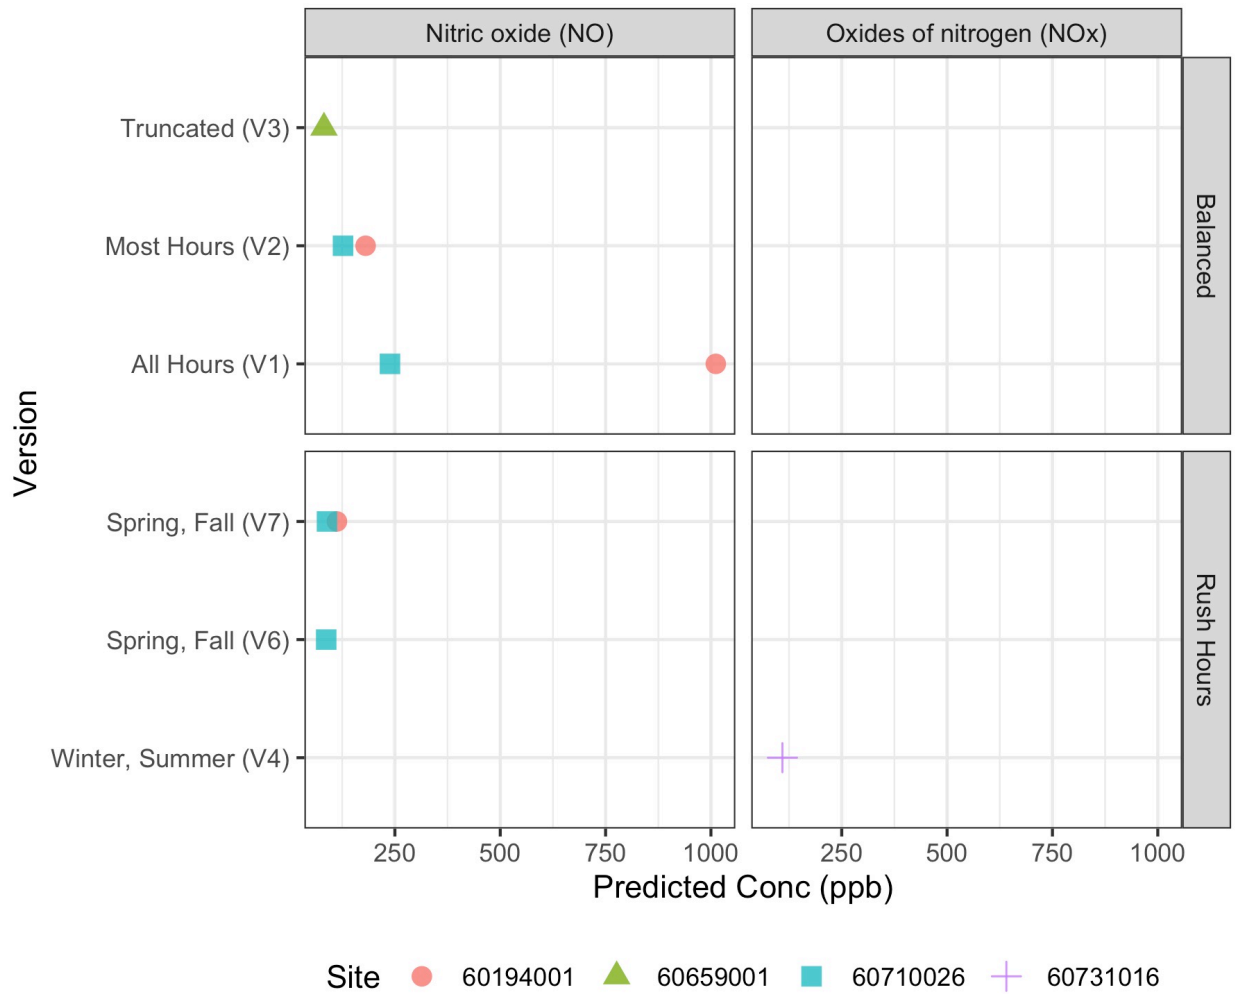

Figure S12. Predictions above 80 ppb excluded from prediction plots, if noted.

Table S6. Predictions above 80 ppb excluded from prediction plots, if noted<sup>1</sup>

| <b>Parameter Name</b>                 | <b>Design</b> | <b>Version</b>      | <b>N</b> | <b>Prediction (ppb)</b> |
|---------------------------------------|---------------|---------------------|----------|-------------------------|
| Oxides of nitrogen (NO <sub>x</sub> ) | Rush Hours    | Winter, Summer (V4) | 1        | 109                     |
| Nitric oxide (NO)                     | Balanced      | All Hours (V1)      | 2        | 238, 1012               |
| Nitric oxide (NO)                     | Balanced      | Most Hours (V2)     | 2        | 127, 181                |
| Nitric oxide (NO)                     | Balanced      | Truncated (V3)      | 1        | 82                      |
| Nitric oxide (NO)                     | Rush Hours    | Spring, Fall (V6)   | 1        | 87                      |
| Nitric oxide (NO)                     | Rush Hours    | Spring, Fall (V7)   | 2        | 89, 113                 |

<sup>1</sup> N is the number of predictions.

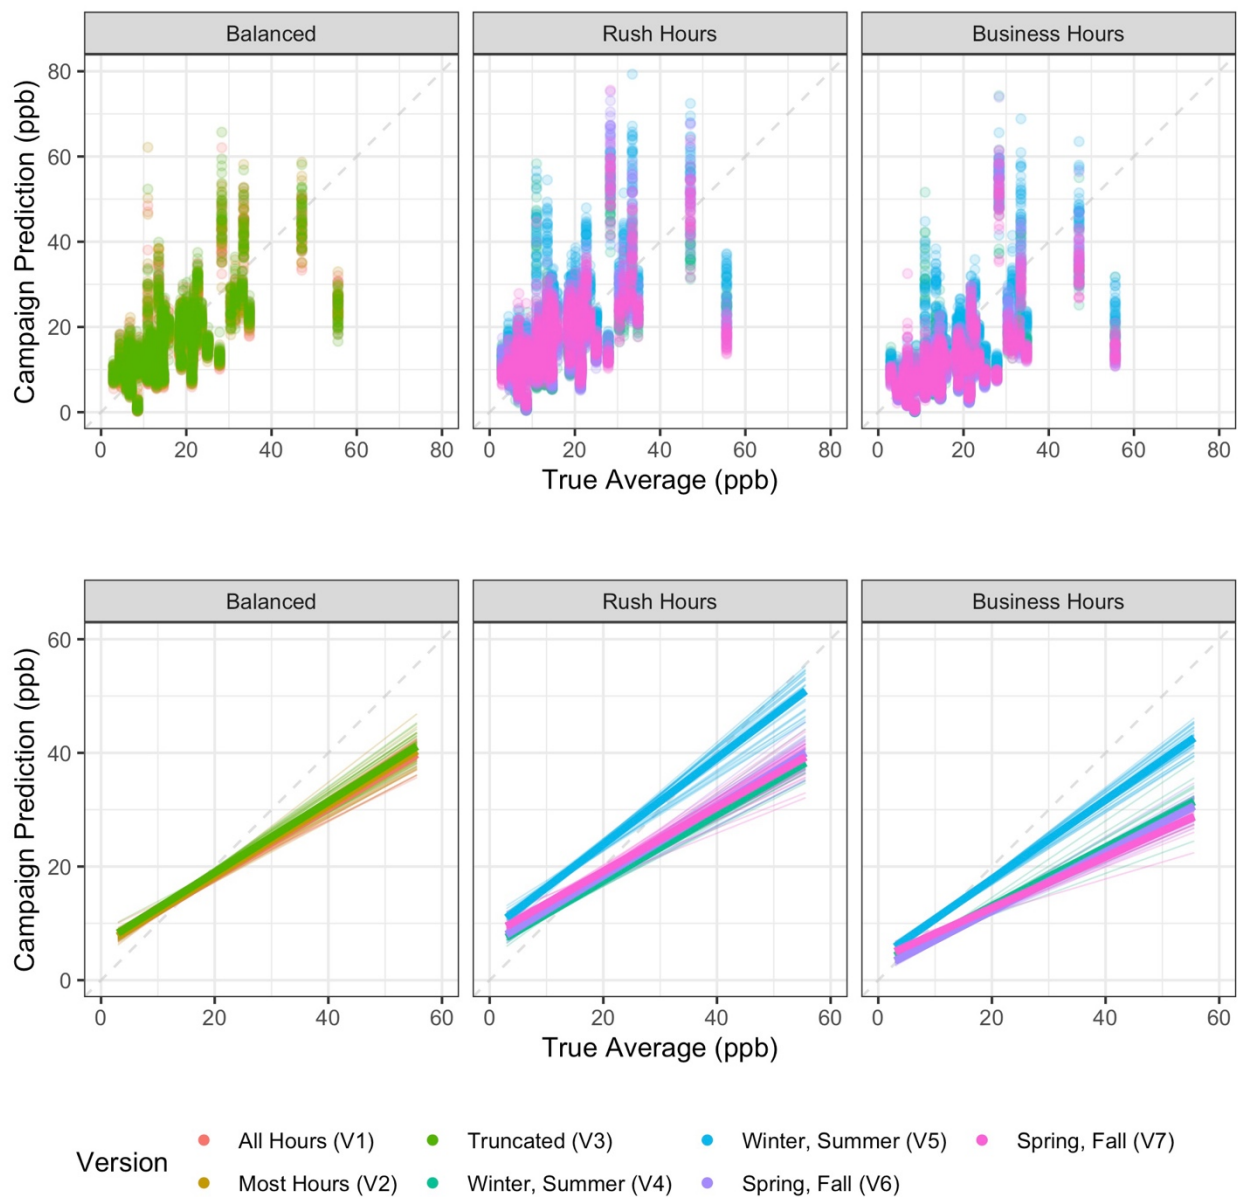

Figure S13. Scatterplots and best fit lines of cross-validated short-term predictions for 30 campaigns vs true average concentrations for NO<sub>x</sub>. Thin transparent lines are individual campaigns, colored by design version; thicker lines are the overall version trend. (One prediction is excluded for clarity from the Rush Hours Version 4 scatterplot at x=24 ppb, y=109 ppb [site 60731016] but is included in the line plots).

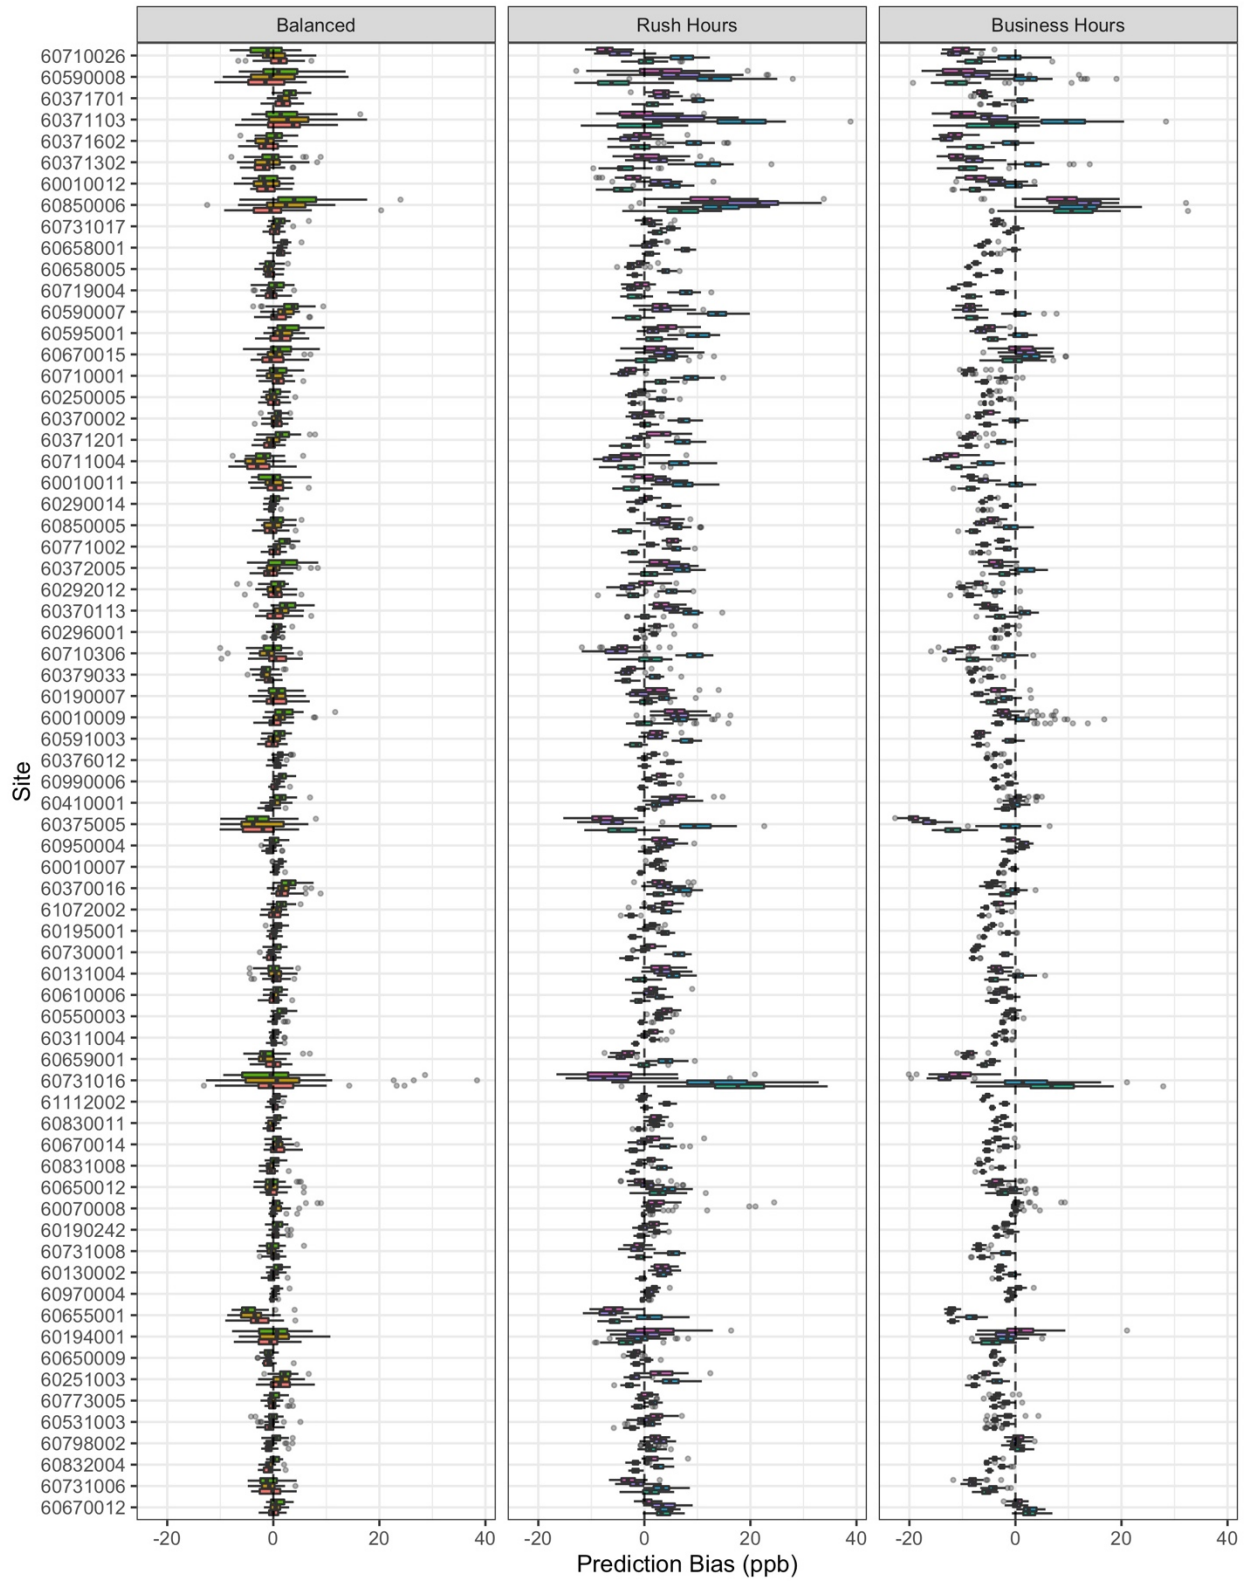

Figure S14. Site-specific NO<sub>x</sub> prediction biases for short-term designs (N = 30 campaigns) as compared to the gold standard (long-term Balanced Design Version 1) predictions for all sites. Sites are arranged by the true NO<sub>x</sub> measurement, with higher concentration sites higher up. One prediction bias for site 60731016 is excluded (86 ppb for Rush Hours Version 4) for clarity.

Table S7. Distribution of prediction bias for short-term approaches relative to the gold standard predictions<sup>1</sup>

| Parameter Name                        | Design         | N     | Min   | Q01   | Median | IQR | Q99  | Max                |
|---------------------------------------|----------------|-------|-------|-------|--------|-----|------|--------------------|
| Oxides of nitrogen (NO <sub>x</sub> ) | Balanced       | 6,210 | -13.1 | -6.9  | 0.2    | 2.4 | 7.9  | 38                 |
| Oxides of nitrogen (NO <sub>x</sub> ) | Rush Hours     | 8,280 | -16.6 | -8.9  | 1.2    | 5.2 | 18.4 | 86                 |
| Oxides of nitrogen (NO <sub>x</sub> ) | Business Hours | 8,280 | -22.7 | -15.2 | -3.8   | 5.3 | 12.8 | 33                 |
| Nitric oxide (NO)                     | Balanced       | 4,590 | -10.5 | -3.8  | 0.1    | 1.7 | 7.2  | 1,006 <sup>2</sup> |
| Nitric oxide (NO)                     | Rush Hours     | 6,120 | -7.9  | -3.8  | 1.3    | 3.4 | 13.1 | 107                |
| Nitric oxide (NO)                     | Business Hours | 6,120 | -10.6 | -7    | -1.8   | 3   | 4.2  | 10                 |
| Nitrogen dioxide (NO <sub>2</sub> )   | Balanced       | 6,300 | -6.9  | -3    | 0.1    | 1.1 | 3.5  | 11                 |
| Nitrogen dioxide (NO <sub>2</sub> )   | Rush Hours     | 8,400 | -8.2  | -4.7  | 0.1    | 2.3 | 6.6  | 24                 |
| Nitrogen dioxide (NO <sub>2</sub> )   | Business Hours | 8,400 | -11.5 | -7.5  | -2.2   | 2.7 | 6.4  | 19                 |

<sup>1</sup> N = the number of sites x 30 campaign repetitions x the number of versions per design

<sup>2</sup> This maximum is the result of a very large outlier prediction

## 5 Model Assessment

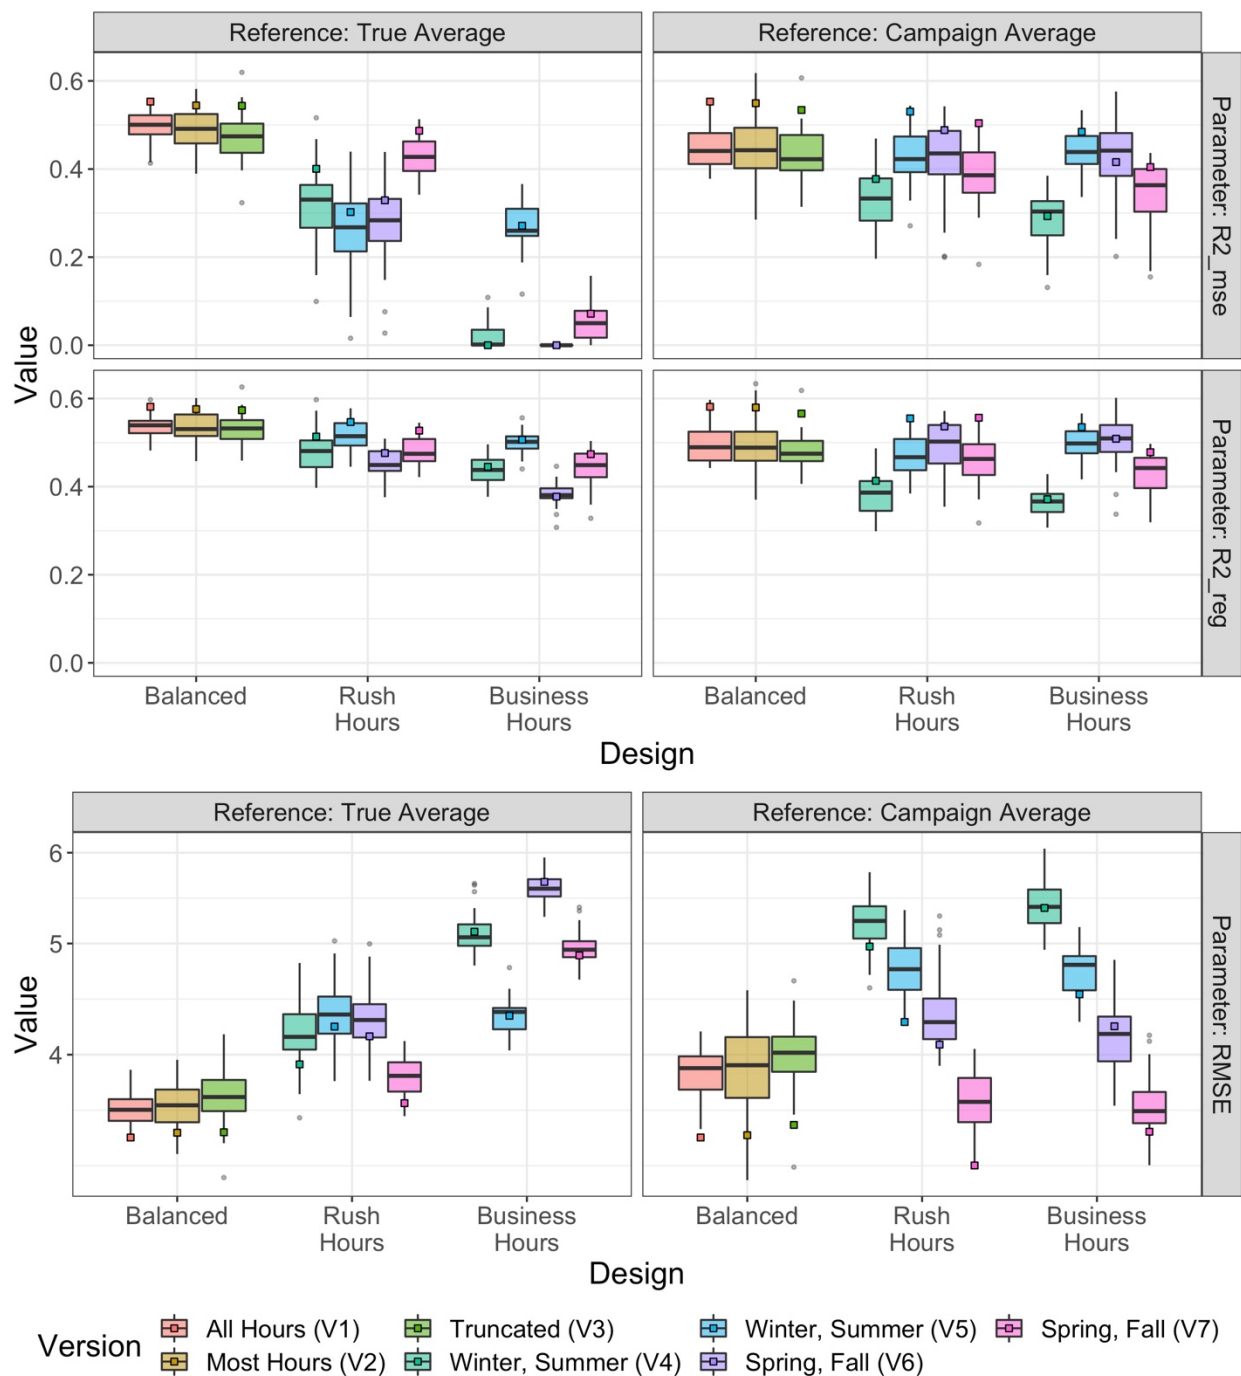

Figure S15. NO<sub>2</sub> Model performances ( $R^2_{MSE}$ ,  $R^2_{reg}$ , and RMSE), as determined by each campaign's cross-validated predictions relative to: a) the true averages (long-term Balanced Version 1), and b) its campaign averages. Boxplots are for short-term approaches (30 campaigns), while squares are for long-term approaches (1 campaign).

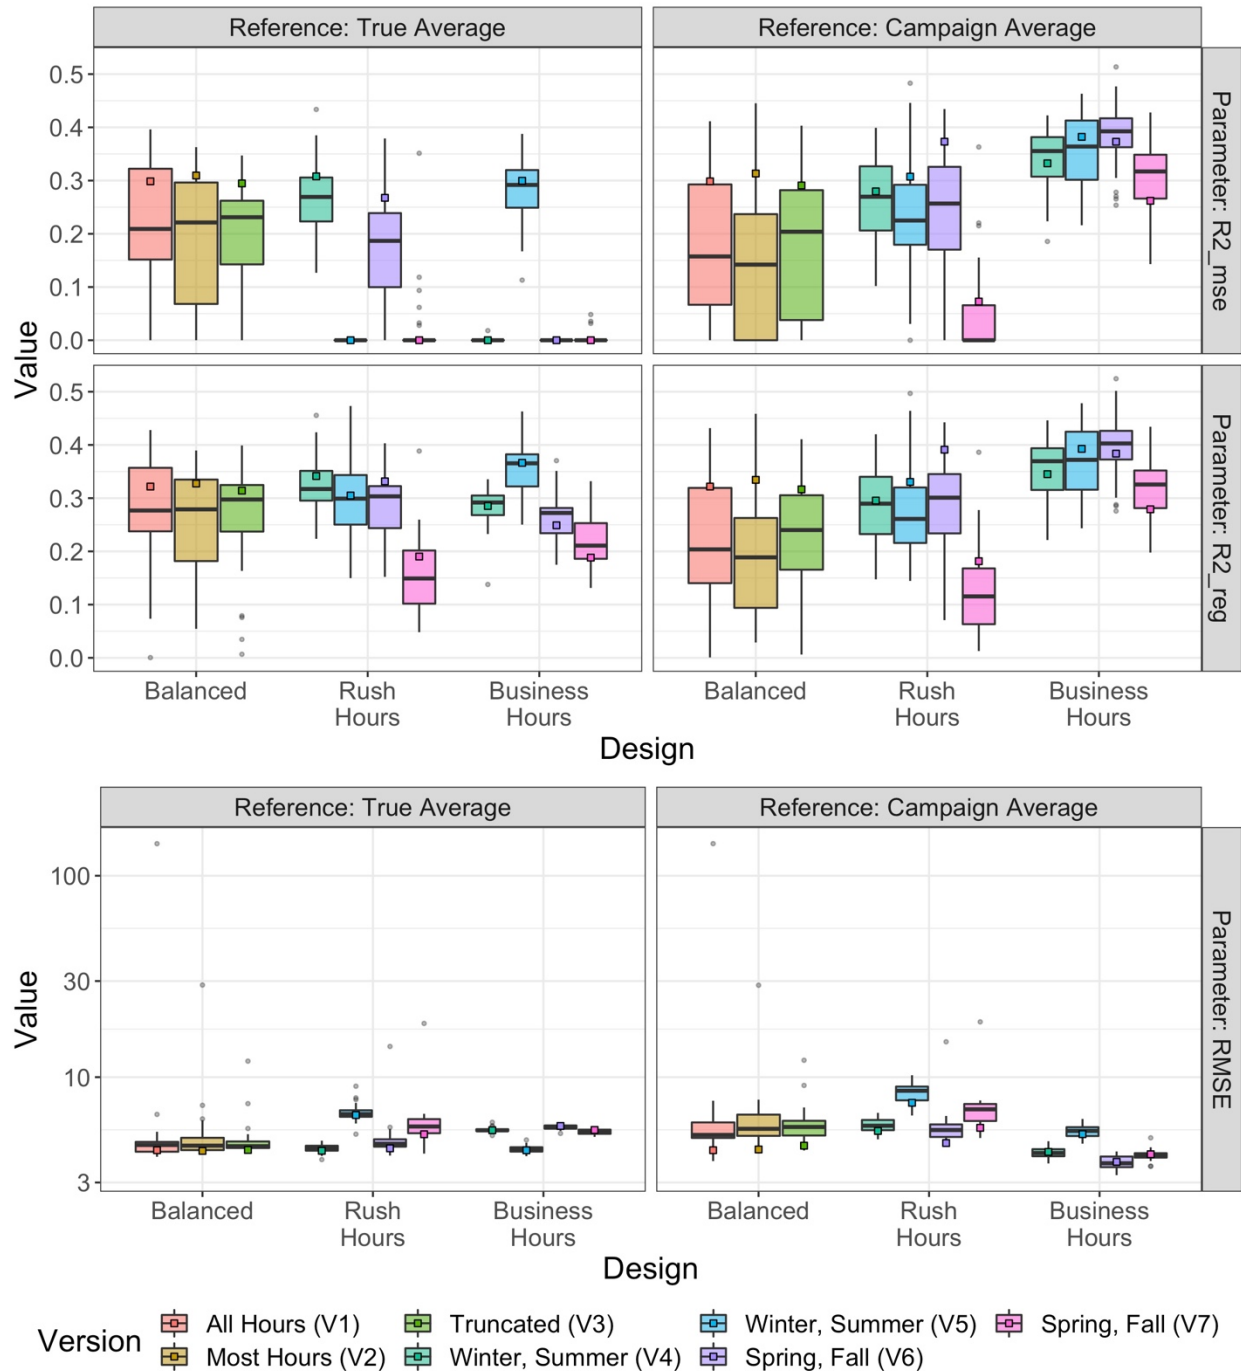

Figure S16. NO Model performances ( $R^2_{MSE}$ ,  $R^2_{reg}$ , and RMSE), as determined by each campaign's cross-validated predictions relative to: a) the true averages (long-term Balanced Version 1), and b) its respective campaign averages. Boxplots are for short-term approaches (30 campaigns), while squares are for long-term approaches (1 campaign). A few influential outliers influenced these performance statistics more so than for NOx and NO<sub>2</sub>.
